# Supplementary material for: Evaluation of the McGrath MAC and Macintosh laryngoscope for tracheal intubation in 2000 patients undergoing general anaesthesia: the randomised multicentre EMMA trial study protocol
Source: PubMed Central journal article supplement — BMJ Open. 2017 Aug 21;7(8):e016907. doi: 10.1136/bmjopen-2017-016907 (PMC5724220; doi:10.1136/bmjopen-2017-016907), 2017-08-21
Supplement: bmjopen-2017-016907.draft_revisions.pdf [file bmjopen-2017-016907.draft_revisions.pdf]

# BMJ Open

## Evaluation of the McGrath MAC and Macintosh Laryngoscope for tracheal intubation in 2000 patients undergoing general anaesthesia: The randomised multicentre EMMA trial study protocol

|                                 |                                                                                                                                                                                                                                                                                                                                                                                                                                                                                                                                        |
|---------------------------------|----------------------------------------------------------------------------------------------------------------------------------------------------------------------------------------------------------------------------------------------------------------------------------------------------------------------------------------------------------------------------------------------------------------------------------------------------------------------------------------------------------------------------------------|
| Journal:                        | <i>BMJ Open</i>                                                                                                                                                                                                                                                                                                                                                                                                                                                                                                                        |
| Manuscript ID                   | bmjopen-2017-016907                                                                                                                                                                                                                                                                                                                                                                                                                                                                                                                    |
| Article Type:                   | Protocol                                                                                                                                                                                                                                                                                                                                                                                                                                                                                                                               |
| Date Submitted by the Author:   | 17-Mar-2017                                                                                                                                                                                                                                                                                                                                                                                                                                                                                                                            |
| Complete List of Authors:       | Kriege, Marc; Johannes Gutenberg Univ Mainz, Anaesthesiology Alflen, Christian; Johannes Gutenberg Univ Mainz, Anaesthesiology Tzanova, Irene<br>Schmidtman, Irene; Johannes Gutenberg Universitat Mainz, Institute of Medical Biostatistics, Epidemiology and Informatics, University Medical Piepho, Tim; Johannes Gutenberg Universitat Universitatsmedizin, Anesthesiology Noppens, Ruediger; Western University, Dept. of Anesthesia & Perioperative Medicine; Johannes Gutenberg Universitat Universitatsmedizin, Anesthesiology |
| <b>Primary Subject Heading</b>: | Anaesthesia                                                                                                                                                                                                                                                                                                                                                                                                                                                                                                                            |
| Secondary Subject Heading:      | Anaesthesia                                                                                                                                                                                                                                                                                                                                                                                                                                                                                                                            |
| Keywords:                       | Adult anaesthesia < ANAESTHETICS, Airway Management, Video laryngoscope, Macintosh Laryngoscope, Difficult Airway, Intubation                                                                                                                                                                                                                                                                                                                                                                                                          |
|                                 |                                                                                                                                                                                                                                                                                                                                                                                                                                                                                                                                        |

SCHOLARONE™  
Manuscripts

# Anaesthesia – Protocol

## Evaluation of the McGrath MAC<sup>®</sup> and Macintosh Laryngoscope for tracheal intubation in 2000 patients undergoing general anaesthesia: The randomised multicentre EMMA trial study protocol

Marc Kriege,<sup>1</sup> Christian Alflen,<sup>1</sup> Irene Tzanova,<sup>2</sup> Irene Schmidtman,<sup>3</sup> Tim Piepho,<sup>1</sup> Ruediger R. Noppens<sup>1,4\*</sup>

### Author Affiliations

<sup>1</sup> Department of Anaesthesiology, University Medical Centre of the Johannes Gutenberg-University, Mainz, Germany

<sup>2</sup> Department of Anaesthesiology, Christophorus- Hospital, Coesfeld, Germany

<sup>3</sup> Institute of Medical Biostatistics, Epidemiology and Informatics, University Medical Centre of the Johannes Gutenberg-University, Mainz, Germany

<sup>4</sup> Department of Anesthesia & Perioperative Medicine, Western University Ontario, Canada

Marc Kriege, MD: makriege@uni-mainz.de

Christian Alflen, MD: Christian@alflen.net

Irene Tzanova, MD: Irene\_Tzanova@christophorus-kliniken.de

Irene Schmidtman, Sc.D: ischmidt@uni-mainz.de

Tim Piepho, MD, PhD: piepho@uni-mainz.de

Rüdiger R. Noppens, MD, PhD: ruediger.noppens@lhsc.on.ca

1  
2  
3 1 **Corresponding author:**  
4

5 2 Ruediger R. Noppens, MD, PhD  
6

7 3 Department of Anesthesia & Perioperative Medicine  
8

9 4 LHSC- University Hospital  
10

11 5 Western University, London, ON, Canada  
12

13 6 339 Windermere Road  
14

15 7 London, Ontario, N6A 5A5  
16

17 8 Canada  
18

19 9 **Email: [ruediger.noppens@lhsc.on.ca](mailto:ruediger.noppens@lhsc.on.ca)**  
20  
21

22 10  
23

24 11  
25

26 12  
27  
28  
29  
30  
31  
32  
33  
34  
35  
36  
37  
38  
39  
40  
41  
42  
43  
44  
45  
46  
47  
48  
49  
50  
51  
52  
53  
54  
55  
56  
57  
58  
59  
60

1  
2  
3 **1 ABSTRACT**  
4

5 **2 Introduction:** The direct laryngoscopy technique using a Macintosh blade is the first  
6 choice globally for most anaesthetists. In case of an unanticipated difficult airway, the  
7 complication rate increases with the number of intubation attempts. Recently, video  
8 laryngoscopy has become a widely accepted method for securing an airway by  
9 tracheal intubation because it enables the visualisation of the glottis without a direct  
10 line of sight. Several studies and case reports have highlighted the benefit of the  
11 video laryngoscope in the visualisation of the glottis and found it to be superior in  
12 difficult intubation situations. The aim of this study is to compare the first-pass  
13 intubation success rate using the McGrath MAC<sup>®</sup> (McGrath) video laryngoscope  
14 compared with conventional direct laryngoscopy in surgical patients.  
15

16 **12 Methods and analysis:** The EMMA trial is a multicentre, open-label, patient-blinded,  
17 randomised controlled trial. Consecutive patients requiring tracheal intubation are  
18 randomly allocated to either the McGrath video laryngoscope or direct laryngoscopy  
19 using the Macintosh laryngoscope. The expected rate of successful first-pass  
20 intubation is 95% in the McGrath group and 90% in the Macintosh group. Each group  
21 must include a total of 1000 patients to achieve 96% power for detecting a difference  
22 at the 5% significance level. Successful intubation with the first attempt is the primary  
23 endpoint. The secondary endpoints are the time to intubation, attempts for successful  
24 intubation, the necessity of alternatives, visualisation of the glottis using the Cormack  
25 & Lehane score and percentage of glottic opening score and definite complications.  
26

27 **22 Ethics and dissemination:** The project was approved by the local ethics committee  
28 of the Medical Association of the Rhineland Palatine state and Westphalia-Lippe. The  
29 results of this study will be made available in the form of manuscripts for publication  
30 and presentations at national and international meetings.  
31

32 **26 Trial registration:** ClinicalTrials.gov NCT 02611986.  
33  
34  
35  
36  
37  
38  
39  
40  
41  
42  
43  
44  
45  
46  
47  
48  
49  
50  
51  
52  
53  
54  
55  
56  
57  
58  
59  
60

1  
2  
3 1 **Strengths and limitations of this study**  
4

- 5 2 • This trial aims to determine whether video laryngoscopy is superior to direct  
6 3 laryngoscopy in daily anaesthesia practice.  
7 4 • The plan is to include 2000 patients in this multicentre, open-label, randomised  
8 5 controlled superiority study.  
9 6 • All training levels of anaesthesiologists (trainee, specialist, expert) are  
10 7 included.  
11 8 • Selected patients with an expected “easy” airway are evaluated.  
12 9 • Only one type of video laryngoscope using a Macintosh-like blade is  
13 10 evaluated. The results cannot be transferred to other kinds of video  
14 11 laryngoscopes (e.g., curved blade, channelled blade).  
15  
16  
17  
18  
19  
20  
21  
22  
23  
24  
25  
26  
27  
28  
29  
30  
31  
32  
33  
34  
35  
36  
37  
38  
39  
40  
41  
42  
43  
44  
45  
46  
47  
48  
49  
50  
51  
52  
53  
54  
55  
56  
57  
58  
59  
60

## 1 INTRODUCTION

### 2 Background and rationale

3 This manuscript was written in accordance with the SPIRIT guidelines.<sup>1</sup>

4 (A) Securing the airway by tracheal intubation with direct laryngoscopy is an  
5 established and preferred technique in emergency settings and clinical anaesthesia  
6 practice. The limitations of direct laryngoscopy are well known. To achieve a learning  
7 curve with a 90% probability of performing a successful intubation, more than 57  
8 attempts are required to develop enough experience with the technique.<sup>2,3</sup> To obtain  
9 optimal visualisation of the glottis, direct laryngoscopy requires alignment of the  
10 oropharyngeal-laryngeal axes.

11 However, the first-pass success rate of intubation in emergency settings ranges from  
12 40 to 80%,<sup>4-9</sup> in intensive care units from 55 to 68%<sup>10,11</sup> and in the operating room  
13 from 63 to 85%.<sup>12-15</sup> Several studies have shown a correlation between increased  
14 complications and more than two intubation attempts.<sup>16-18</sup>

15 Indirect video laryngoscopy has become a widely accepted method for learning the  
16 techniques of airway management because it enables an optimised view of the glottis  
17 without a direct line of sight.<sup>19-21</sup> Thus, video laryngoscopy plays an important role in  
18 the management of patients with unanticipated airway difficulties or failed tracheal  
19 intubation. The use of video laryngoscopy (VL) is associated with a reduction in  
20 airway complications in clinical emergency and anaesthesia practice.<sup>18,22</sup> Despite the  
21 optimised visualisation of the glottis, the duration of tracheal intubation can be  
22 prolonged, and intubation attempts can fail.<sup>21-24</sup> Compared to direct laryngoscopy, the  
23 learning curve associated with the video laryngoscope is steep.<sup>25</sup> Video laryngoscopy  
24 varies in the design of the curved or angulated blade, mobility, size of the monitor  
25 display and operation of the micro camera on the blade.

26 Over the last 10 years, several studies and a recent Cochrane review<sup>26</sup> have  
27 compared different video laryngoscopes to direct laryngoscopy or to each other,  
28 focusing on endotracheal intubation (ET) in emergency settings or in patients  
29 undergoing elective surgery in an operating room. The results suggested advantages  
30 in superior visualisation of the glottis,<sup>19,21,23</sup> a higher first-pass success rate<sup>4,11,19,24</sup>,  
31 and reduction of airway complications as well as benefits in those patients with a  
32 difficult airway.<sup>20-23</sup> However, most of these studies had methodological weaknesses,  
33 including studies with small sample sizes,<sup>6,13,19-21,24</sup> evaluation in intensive care units

1  
2  
3 1 4,7,10,11,27,28 or emergency departments,<sup>5,6,8,9</sup> manikin studies<sup>19,20,23</sup> and inclusion of  
4 patients who were anticipated to have a difficult airway.<sup>12,19-21,23</sup>

5  
6 2 Studies conducted more recently have suggested advantages with video  
7 laryngoscopy but either failed to routinely use neuromuscular blockade<sup>4</sup> or included  
8 patients with highly specific characteristics.<sup>9</sup> Special study characteristics are listed in  
9 Table 1.  
10  
11  
12  
13

14  
15 8 (B) We chose to study the McGrath<sup>®</sup> MAC (McGrath; Covidien, Dublin, Ireland) video  
16 laryngoscope because it is a portable, relatively inexpensive device with a Macintosh-  
17 based blade similar to that in the Macintosh laryngoscope (DL; Stoss Medica,  
18 Wiesbaden, Germany). It therefore provides both a direct view of the glottis and an  
19 indirect view on the monitor display, which can be beneficial in the case of  
20 oropharyngeal mismatch. Our specific choice of the McGrath video laryngoscope was  
21 based on the following considerations:  
22

- 23 15 • The Macintosh-based curved blade of the McGrath is comparable to the  
24 Macintosh blade;
- 25 17 • The video display of the McGrath allows visualisation of the glottis by the  
26 operator along with study measurement or teaching by a consultant when  
27 tracheal intubation is performed by an inexperienced provider; and
- 28 20 • The McGrath is available with a disposable blade in different sizes and allows  
29 a swift change to treat more patients consecutively.

30  
31  
32  
33  
34  
35  
36  
37  
38 22 The aim of this study is to evaluate whether the use of the McGrath (vicarious for  
39 Macintosh- like blade video laryngoscopes) improves the first-pass success rate  
40 compared with the DL in surgical patients with an expected normal airway  
41 undergoing general anaesthesia. We hypothesise that tracheal intubation using the  
42 McGrath decreases the frequency of failed intubation and airway complications.  
43  
44  
45  
46  
47  
48  
49  
50  
51  
52  
53  
54  
55  
56  
57  
58  
59  
60

**Table 1. Recapitulation of previous studies on endotracheal intubation with videolaryngoscopy in different study settings.**

| First author                                                                           | Device                           | Operators                                    | Centre     | Design         | N   | First-pass Success (DL vs. VL)                       | p value | Comments      |
|----------------------------------------------------------------------------------------|----------------------------------|----------------------------------------------|------------|----------------|-----|------------------------------------------------------|---------|---------------|
| <i>Data shown a higher First-pass Success rate with the Videolaryngoscopy</i>          |                                  |                                              |            |                |     |                                                      |         |               |
| Silverberg et al. <sup>4</sup>                                                         | GS                               | Attending's                                  | Monocentre | Randomised     | 117 | 40% vs. 74%                                          | < 0.001 | ICU           |
| Park et al. <sup>5</sup>                                                               | GS                               | Non-anaesthesiologists                       | Monocentre | Randomised     | 82  | 55.9% vs. 91.8%                                      | < 0.001 | ED            |
| Ahmadi et al. <sup>6</sup>                                                             | GS                               | Residents                                    | Monocentre | Randomised     | 97  | 60.9% vs. 87.5%                                      | 0.036   | ED            |
| Mosier et al. <sup>7</sup>                                                             | GS, CMAC                         | Non- anaesthesiologists residents/ attending | Monocentre | Non-randomised | 234 | 60.7% vs 78.6%                                       | 0.009   | ICU           |
| Sakles et al. <sup>8</sup>                                                             | GS                               | Resident                                     | Monocentre | Randomised     | 822 | 57% vs. 75%                                          | 0.03    | ED            |
| Noppens et al. <sup>10</sup>                                                           | CMAC                             | Residents                                    | Monocentre | Prospective    | 274 | 55% vs. 79%                                          | 0.03    | ICU           |
| Kory et al. <sup>11</sup>                                                              | GS                               | Non- anaesthesiologists                      | Monocentre | Retrospective  | 128 | 68% vs. 91%                                          | 0.01    | ICU           |
| Noppens et al. <sup>19</sup>                                                           | McGrath S5                       | Residents                                    | Monocentre | Prospective    | 67  | 69% vs. 95%                                          | < 0.001 |               |
| Savoldelli et al. <sup>22</sup>                                                        | GS, McGrath S5, Airtraq          | Mixed                                        | Monocentre | Randomised     | 60  | 63% vs. 88% vs. 100% vs. 88%                         | < 0.001 | Manikin-study |
| Kasuya et al. <sup>37</sup>                                                            | McGrath                          | Anesthesia trainees                          | Monocentre | NR             | NR  | 78.6% vs. 92.8%                                      | < 0.001 |               |
| <i>Data shown a similar or higher First-pass Success rate with Direct Laryngoscopy</i> |                                  |                                              |            |                |     |                                                      |         |               |
| Yeatts et al. <sup>9</sup>                                                             | GS                               | Mixed                                        | Monocentre | Randomised     | 623 | 80% vs. 81%                                          | 0.46    | ED            |
| Piepho et al. <sup>12</sup>                                                            | CMAC                             | Residents                                    | Monocentre | Prospective    | 52  | 79% vs. 81%                                          | 0.8     |               |
| Ruetzler et al. <sup>21</sup>                                                          | CMAC,GS, McGrath S5, KV, Airtraq | Mixed                                        | Monocentre | Randomised     | 27  | 96.7% vs. 100% vs. 44.4% vs. 77.8 vs. 88.9% vs. 100% | < 0.001 | Manikin-study |
| Piepho et al. <sup>24</sup>                                                            | McGrath S5, GS                   | Paramedics                                   | Monocentre | Randomised     | 30  | 94.4% vs. 97.7%                                      | > 0.05  | Manikin-study |
| Purugganan et al. <sup>36</sup>                                                        | McGrath, C-MAC                   | Residents                                    | Monocentre | Randomised     | 130 | 95% vs. 87% vs. 91%                                  | 0.4     |               |

Mixed (Residents/ Attending's); ED (Emergency Department); ICU (Intensive Care Unit); CMAC= C-MAC (Storz, Germany); GS= GlideScope (Verathon, USA); BO= Bonfils (Storz, Germany); McGrath= McGrath (Medtronic, Ireland); McGrath Series 5= McGrath (Medtronic, Ireland); KV= King Vision (Kingssystems, USA); Airtraq (Airtraq, USA); AWS= Airway-scope (Pentax, Japan); NR (Not reported)



## 1 **Study aims and objectives**

2 *Primary objective:* Comparing the initial or first-pass success rate of endotracheal  
3 intubation with the McGrath video laryngoscope to DL using a Macintosh blade in  
4 patients undergoing elective surgery and requiring tracheal intubation.

5 *Secondary objective:* Comparing the clinical performance of both devices, view of the  
6 glottis, influence of neuromuscular agents, correlation between clinical experiences in  
7 airway management and success rates.

## 9 **Trial design**

10 The EMMA trial is a multicentre, open-label, randomised controlled superiority trial.

## 12 **METHODS: PARTICIPANT SELECTION, INTERVENTIONS AND OUTCOMES**

### 13 **Study setting**

14 The EMMA trial is currently started in eight Divisions of Anaesthesiology in two  
15 hospitals (one university and one general hospital). Another centre All  
16 laryngoscopists are anaesthetists with different levels of clinical experience using  
17 direct and video laryngoscopy. After a specific introduction to the study protocol, all  
18 anaesthetists from the study centres participated in this trial.

### 20 **Eligibility criteria**

#### 21 Inclusion criteria

22 Patients having elective surgery with general anaesthesia and requiring mechanical  
23 ventilation via an endotracheal tube are recruited.

#### 25 Exclusion criteria

26 Patients are not included in this study if they have one or more of the following:

- 27 • More than one predictor of an anticipated difficult airway (e.g., BMI > 40 kg/m<sup>2</sup>,  
28 unanticipated difficult airway in the medical history (e.g., C&L ≥ III), reduction of  
29 the atlanto-occipital joint extension < 35°, reduced thyromental distance < 6 cm  
30 or Mallampati class ≥ III);
- 31 • Age < 18 years;
- 32 • ASA class IV;
- 33 • Pregnant or breastfeeding;
- 34 • Participation in other studies;

- 1 • Unable to provide informed written consent or under guardianship;
- 2 • Urgent surgical intervention; and
- 3 • At high risk for aspiration (e.g. delayed gastric emptying, incompetent lower
- 4 oesophageal sphincter, oesophageal diseases).

## 7 **Intervention**

8 Concomitant treatments in both groups

9 First, patients admitted requiring elective tracheal intubation are evaluated for  
10 predictors of anticipated difficult intubation (body mass index, head extension,  
11 thyromental distance, Mallampati class, mouth opening and previous difficult airway  
12 (e.g., C&L  $\geq$  III). The expertise of the participating anaesthesiologists ranges from  
13 “beginner” (residents) to “expert” (consultants). Every anaesthesiologist participating in  
14 this study has a clinical experience with at least 25 intubations using DL and at least five  
15 intubations using video laryngoscopy. All anaesthetists received hands-on training and  
16 theoretical introduction to the use of the McGrath VL and direct laryngoscopy.  
17 Tracheal intubation is performed in both groups following the protocol outlined below  
18 (Figure 1).

19 (A) All patients are monitored for ECG, oxygen saturation ( $SO_2$ ), and arterial blood  
20 pressure (non-invasive or invasive as appropriate). Pre-oxygenation is achieved  
21 using the device chosen by the provider based on patient characteristics and clinical  
22 standard operating procedure ( $EtO_2 > 80\%$ ). In our anaesthesia practice, we use the  
23 Pallas<sup>®</sup> / Primus<sup>®</sup> (Dräger Lübeck, Germany) anaesthesia respiratory system:

- 24 • Tidal volume breathing with normal breaths for at least 3 min or with eight  
25 deep breaths over 60 seconds (8 DB 60 sec);<sup>29,30</sup>
- 26 • Anaesthesia ventilator in pressure support (PS) mode (PS 8 mbar, PEEP 5  
27 mbar and  $FiO_2$  1.0).<sup>30,31</sup>

28 (B) After sufficient pre-oxygenation, anaesthesia is induced with sufentanil (0.2 – 0.5  
29  $\mu\text{g.kg}^{-1}$ ) and propofol (2 – 3  $\text{mg.kg}^{-1}$ ), and anaesthesia is maintained with either  
30 propofol infusion (TIVA) or volatile anaesthetics. After the patient is deeply  
31 anaesthetised, the neuromuscular transmission is monitored using  
32 acceleromyography of the adductor pollicis. The individual choice of neuromuscular  
33 blocking agent depends on the temporal duration of the surgery, necessary of

1 perioperative neurological monitoring, absence of allergies and organ failures. The  
2 following agents and specific dosages are used:

- 3 • Mivacurium (0.2 mg.kg<sup>-1</sup>);
- 4 • Atracurium (0.5 mg.kg<sup>-1</sup>);
- 5 • Rocuronium (0.3 - 0.6 mg.kg<sup>-1</sup>); and
- 6 • Succinylcholine (1 - 2 mg.kg<sup>-1</sup>).

7 The train-of-four (TOF) is used for continuous quantitative monitoring of  
8 neuromuscular transmission. Complete muscle relaxation is confirmed in the  
9 absence of tactile and measured twitches in response to maximal TOF stimulation of  
10 the ulnar nerve at the adductor pollicis. The importance of obtaining adequate  
11 neuromuscular blockade will emphasise with study personnel.

12  
13 (C) The laryngoscopy attempt begins with a TOF count of 0/4 and is performed using  
14 the device indicated by default randomisation:

- 15 • Macintosh laryngoscope (DL) or
- 16 • McGrath<sup>®</sup> MAC video laryngoscope (McGrath) – initially as an indirect  
17 laryngoscope. However, direct laryngoscopy can be performed at the  
18 discretion of the anaesthetist.

19 The provider selects the method for visualisation of the glottis, either direct or  
20 indirect, using the McGrath monitor. The anaesthetist should achieve the best  
21 possible view of the laryngeal structures. External laryngeal manipulations (ELM)  
22 could be used to improve the view of the glottis to achieve a C&L I or II. The size of  
23 the endotracheal tube and the size of the blade are dependent on the standard  
24 operating procedure of the hospital (blade size in both groups: #3 for average  
25 patients and #4 for very tall patients (> 190 cm height); standard ET size: 7.0 ID used  
26 for female patients and 7.5 ID for male patients). The method of visualisation of the  
27 glottis and size of the ET/ blade is recorded in the case report form (CRF).

28 (D) The laryngoscopy attempt is defined as successful if the tracheal tube is placed  
29 (confirmed by persistent end-tidal carbon dioxide) with a single blade insertion within  
30 120 seconds and without manipulation of the laryngoscope by another provider. The  
31 “time to intubation” is defined as the time from the insertion of the device into the  
32 mouth until confirmation of the first wave of CO<sub>2</sub> of the anaesthesia respirator. The  
33 anaesthesia nurse measures the intubation time using the built-in timer on the  
34 anaesthesia respirator. We also analyse two time periods before final placement:

- 1
- 2
- 3 • “Time to view”: defined as the time when the blade tip passing the incisors until
- 4 visualisation of the glottis; and
- 5
- 6 • “Placement of the ET”: defined as the time from insertion of the ET until the black
- 7
- 8 mark on the ET is threaded between the vocal cords.
- 9

10 If this first attempt fails, the provider makes a second laryngoscopy attempt with the

11 same device. Mask ventilation is recommended between the attempts. A malleable

12 stylet is allowed at the second attempt to reduce the risk of multiple intubation

13 attempts. A total of two laryngoscopy attempts are allowed. If DL fails, the clinician

14 changes to a preferred technique (e.g., McGrath, S-Guide®, rigid stylet) and records

15 the direct and/or screen view of the McGrath. If McGrath fails after two attempts, the

16 clinician is advised to proceed with a preferred rescue technique (e.g., C-MAC® D-

17 Blade, SGA, iLMA, fiberoptic, rigid stylet). The limitation of two intubation attempts

18 and choice of an alternative technique is recommended by the study protocol and is

19 in accordance with the clinical standard.<sup>32</sup> If ELM techniques, such as BURP (specific

20 pressure applied to the cricoid cartilage), are required during laryngoscopy, they are

21 recorded in the CRF. In all cases, an additional individual who is not involved in

22 patient care (either a postgraduate student or a study nurse) is present during

23 induction of anaesthesia to record the study parameters.

24

25

26

27

28

29

30

31

32

33

34

## 35 Outcome measures

### 36 (a) Primary outcome measure

37 The primary outcome measure is successful intubation within 120 seconds (time to

38 ventilation) with the first-pass attempt.

39

40

41

42

### 43 (b) Secondary outcome measure

- 44
- 45 • Laryngoscopy Technique: Whether direct or indirect glottic visualisation is
- 46 used in the McGrath group is recorded
- 47
- 48 • Different times for successful tracheal intubation
- 49
- 50 • Time to view (defined as the time when the blade tip passing the incisors
- 51 until glottic view)
- 52
- 53 • Time to place the ET (defined as the time when the blade tip passing the
- 54 incisors until the black mark on the ET is threaded through the vocal
- 55 cords)
- 56
- 57 • Total time to successful placement (defined as the time from insertion of
- 58
- 59
- 60

1  
2  
3 the device until the first carbon dioxide wave on the anaesthesia  
4 respirator)

- 5  
6  
7  
8  
9  
10  
11  
12  
13  
14  
15  
16  
17  
18  
19  
20  
21  
22  
23  
24
- 15 • Number of laryngoscopy attempts
  - 16 • Failures/ crossovers to other rescue techniques (e.g., SGA, iLMA, fiberoptic)
  - 17 • External laryngeal manipulations (e.g., BURP, cricoid pressure)
  - 18 • Glottic view with the Cormack & Lehane grade (C&L) and percentage of glottic opening score (POGO)
  - 19 • Intubation difficulty score (IDS-Score)<sup>33</sup>
  - 20 • If McGrath is used, occurrence of fogging is recorded
  - 21 • Complications (e.g., desaturation < 90% SaO<sub>2</sub>, dental or soft tissue trauma)
  - 22 • Degree of ease or difficulty of tracheal intubation based on the Likert scale (0=easy to 10=difficult)<sup>34,35</sup>

#### 25 (c) Subgroup analysis

- 26  
27  
28  
29  
30  
31  
32  
33  
34  
35  
36  
37  
38  
39  
40  
41  
42  
43  
44  
45  
46  
47  
48  
49  
50  
51  
52  
53  
54  
55  
56  
57  
58  
59  
60
- 27 • Demographics
    - 28 • Patient (age, gender, BMI, ASA class)
    - 29 • Airway difficulty score (ADS score)<sup>36</sup>
    - 30 • Provider analysis (clinical experience, education status, experience in direct and indirect laryngoscopy)
  - 31 • Type of neuromuscular blocking agent
  - 32 • Endotracheal tube (ET) with or without malleable stylet when using McGrath
  - 33 • Type of surgery (e.g., thyroidectomy, neck dissection)

#### 42 **Participant timeline**

43 The schedule of enrolment and intervention is shown in Figure 1, and the participant  
44 timeline is described in Table 2.  
45  
46  
47  
48  
49  
50  
51  
52  
53  
54  
55  
56  
57  
58  
59  
60

Table 2. Participant timeline.

| Timepoint                                 | Study Period       |                       |                            |                             |                                   | Extubation<br>$D_{1-2}$ |
|-------------------------------------------|--------------------|-----------------------|----------------------------|-----------------------------|-----------------------------------|-------------------------|
|                                           | Enrolment<br>$D_0$ | Intervention<br>$D_1$ | Intubation                 |                             |                                   |                         |
|                                           |                    |                       | $D_1$<br>(Time<br>to view) | $D_1$<br>(Time<br>to place) | $D_1$<br>(Time<br>to ventilation) |                         |
| Eligibility Assessment                    | X                  |                       |                            |                             |                                   |                         |
| Informed consent                          | X                  |                       |                            |                             |                                   |                         |
| Randomisation                             | X                  |                       |                            |                             |                                   |                         |
| Demographic data and physical Examination | X                  |                       |                            |                             |                                   |                         |
| Preoxygenation                            |                    | X                     |                            |                             |                                   |                         |
| Induction of Anaesthesia                  |                    | X                     |                            |                             |                                   |                         |
| TOF measurement                           |                    | X                     |                            |                             |                                   |                         |
| Time measurement                          |                    |                       | X                          | X                           | X                                 |                         |
| Glottic View                              |                    |                       | X                          |                             |                                   |                         |
| Intubation success                        |                    |                       |                            |                             | X                                 |                         |
| Complications                             |                    |                       | X                          | X                           | X                                 | X                       |

$D$ = Day;  $D_0$ = Day of Enrolment / Allocation;  $D_1$ = Day of Surgery;  $D_2$ = Intensive care unit (ICU) stay

## Recruitment

Patient inclusion started in November 2016 in the Division of Ear, Nose and Throat surgery at University Medical Centre, Mainz, Germany, and inclusion of other divisions over the course of time is planned. The history and physical examinations of all patients scheduled for surgery are screened preoperatively for predictors of difficult airway. Patient recruitment is conducted by one of the study physicians. Patients are included if they require orotracheal intubation with an ET under general anaesthesia with neuromuscular agents.

## **METHODS: ASSIGNMENT OF INTERVENTIONS**

### **Allocation**

After eligibility is confirmed and written informed consent is obtained, enrolled participants are randomised 24 hours before the intervention. A web-based service (QuickCalcs, GraphPad Software, La Jolla, CA, USA) is used for allocating patients to either DL or McGrath.

### **Sequence generation**

The randomisation sequence is generated by a study nurse in the Clinical Research Unit who is not involved in patient recruitment. The software used to collect the data in the CRF automatically allocated the patients, thereby ensuring concealment and anonymity.

### **Blinding**

Blinding to the type of laryngoscopy is only possible for the patient. The performing anaesthesiologist is informed of treatment group prior to induction of anaesthesia.

## **METHODS: DATA COLLECTION, MANAGEMENT, AND ANALYSIS**

### **Data collection and management**

The study data are recorded on a specific paper-based case report form (CRF). Prior to measurement, the data from each patient are collected by study personnel. All outcome measurements are recorded during and after the evaluation on the CRF. Any protocol deviations are recorded either on the CRF or in the medical records; a clinical research assistant ensures that all protocol deviations and adverse events are recorded in the database. If adverse events are observed, the ethics committee will be informed in writing.

Every allocated subject will be coded with a specific patient number. After measurement is completed, the study data will be entered into a premade computer-based table (Microsoft Excel, Version 14.0, Microsoft Corporation, Redmond, Washington, USA). The completed CRF will be secured in the Clinical Research Unit for the next 15 years.

1  
2  
3 1  
4 2  
5  
6 3  
7  
8 4  
9 5  
10 6  
11 7  
12 8  
13 9  
14 10  
15 11  
16 12  
17 13  
18 14  
19 15  
20 16  
21 17  
22 18  
23 19  
24 20  
25 21  
26 22  
27 23  
28 24  
29 25  
30 26  
31 27  
32 28  
33 29  
34 30  
35 31  
36 32  
37 33  
38 34  
39 35  
40 36  
41 37  
42 38  
43 39  
44 40  
45 41  
46 42  
47 43  
48 44  
49 45  
50 46  
51 47  
52 48  
53 49  
54 50  
55 51  
56 52  
57 53  
58 54  
59 55  
60 56

### Statistics

For statistical analysis, GraphPad Prism (Version. 6.0 for MAC; GraphPad Software, La Jolla, CA, USA) will be used. Data are expressed as the median (interquartile range [IQR]) for non-Gaussian variables. The statistical analysis will conform to the CONSORT statement for non-pharmacological interventions.

#### Description of the patient groups at baseline

The baseline features of the patients will be described using absolute numbers (n) and percentages for categorical variables and the minimum, maximum, mean, SD and quartiles for quantitative variables. We will use the Pearson correlation coefficient to compare patient specifics (e.g., BMI, ADS score) between the groups at the baseline.

#### Analysis of the primary outcome

A chi-squared test will be used to compare the success rate between the two groups. Multiple regression analysis of subgroup factors will allow the determination of important factors affecting successful first-time intubation comparing DL with McGrath. Relationships between the experience of the provider and the first-attempt intubation rate or time to intubation will be analysed as paired samples with Bonferroni correction for multiple comparisons. The differences will be considered statistically significant if the p-value is less than 0.05.

#### Analysis of the secondary outcomes

Comparison of the view of the glottis, overall intubation time and the Likert scale score will be analysed by the Wilcoxon's Rank Sum test.

#### Subgroup analysis

We will perform a separate analysis of the specific type of surgery (e.g., thyroidectomy, neck dissection), influence of neuromuscular agents and/or patients with difficult intubation, defined as more than two attempts or IDS score > 5.



### Sample Size

A sample size calculation was based on achieving successful tracheal intubation on the first attempt within 120 seconds (time to ventilation) compared to more than one attempt. We determined the power of the study by assuming a first-pass success rate of 85% (DL)<sup>14,15</sup> and 90% (McGrath).<sup>37,38</sup> On the basis of the current first-pass success rate, we hypothesised that an increase of 5% by skilled laryngoscopists in the McGrath group compared to the DL group would be a relevant improvement in airway management. We determined that the inclusion of 1000 patients per group would show relevant differences. With 1000 patients, an increase from 85% - 90% (DL) and 90% to 95% (McGrath) in the first-pass success rate can be observed with a power of 96% at the 1.67% significance level.

## VI. METHODS: MONITORING

### Data monitoring

Prior to the start of patient enrolment, the study physicians and the clinical research assistants are involved in the study protocol and data collection in CRFs. All documents required for the study (e.g., informed consent, CRF baseline and perioperative) are available in the operating room, where the study measurement begins. The CRF is prepared and managed by the investigator. Because this is an investigator initiated trial (IIT), the principal investigator meets with clinical research assistants to discuss any problems in data collection and protocol compliance and to evaluate study progress. This study is proposed, managed and will be analysed in accordance with the ICH Guideline for GCP (good clinical practice) E6 (R2) and following the requirements of German law. All persons (e.g., investigator, study assistants) are obliged to follow these rules.

### Harms

The study may be temporarily stopped for an individual patient, at the discretion of the attending physician, in case of major serious adverse events suspected to be associated with the type of laryngoscope used. Reporting of severe adverse events (SAE) will be per local Research Ethics Committee (REC) standard operating procedures. SAEs will include the following when occurring as a result of airway

1 manipulation (cardiac arrest, acute circulatory failure, death, vocal cord injury,  
2 oesophageal rupture). The principal investigator informs the REC about the SAE. No  
3 specific reporting procedure for unexpected serious adverse events is planned.  
4

### 5 **Auditing**

6 The Clinical Research Unit of the Department of Anaesthesiology, University Medical  
7 Centre Mainz reviews the screening form and clinical data at regular intervals.  
8

## 9 **ETHICS AND DISSEMINATION**

### 10 **Research ethics approval**

11 This study is conducted in adherence with the current version of the Declaration of  
12 Helsinki and GCP Guidelines. The initial research project was approved by the ethics  
13 committee (Medical Association of the State of Rhineland Palatinate, Germany) in  
14 October 2015 (Registration Nr.: 837.296.15 (10064); NCT 02611986). It was also  
15 approved by the Medical Association Westphalia, Lippe, Germany, in March 2016  
16 (Registration Nr.: 2016-110-b-S).  
17

### 18 **Consent or assent**

19 Prior to the trial, patients must consent orally and in writing after the possible  
20 consequences of the clinical study are explained in an understandable way. All  
21 documents must be written in German and comprehensible. According to German  
22 law, only a physician can have the conversation with the participant. The patient  
23 receives a copy of the signed patient information and informed consent. A patient  
24 may withdraw from the study at any time if he is unwilling to continue in the trial. In  
25 this case, the data from a patient who requests full withdrawal will not be considered  
26 in the data analysis.  
27

### 28 **Confidentiality**

29 All original documents will be kept in the Clinical Research Unit for the next 15 years.  
30

### 31 **Declaration of interests**

32 Neither the Department of Anaesthesiology of the University Medical Centre of the  
33 Johannes Gutenberg University-Mainz, Germany nor any of its employees received  
34 any compensation for this work. No funding or competing interests are declared.

1  
2  
3 1 None of the authors have financial interests or received honoraria or paid expert  
4 2 testimony. None of the authors have any personal relationships with people or  
5 3 organisations that could inappropriately influence (bias) this work. Covidien®, which  
6 4 produces the McGrath video laryngoscope, had no role in the study design and will  
7 5 have no role in its conduct, data collection, analysis, or interpretation, or the decision  
8 6 to submit the results for publication.  
9  
10  
11  
12  
13

## 14 **DISCUSSION**

15  
16 9 To our knowledge, the EMMA trial is one of the largest such randomised, multicentre  
17 10 trials. Several studies have suggested that video laryngoscopy and direct  
18 11 laryngoscopy using a Macintosh blade had similar intubation success rates.<sup>9,20,21,24</sup>

19 12 The weaknesses of the existing research include the study setting (e.g., manikin-  
20 13 based study or measurement in ICU)<sup>10,11,20,21</sup> and study design (e.g., inadequate  
21 14 sample size or variables in anaesthesia induction).<sup>4,6,24</sup> Furthermore, the clinical  
22 15 experience of the user was not usually taken into account.<sup>5,7,11,24,27</sup> To our  
23 16 knowledge, the EMMA study is the only clinical, multicentre, randomised study with  
24 17 2000 patients comparing video laryngoscopy and direct laryngoscopy for the first  
25 18 attempt tracheal intubation. This trial has an open-label design; blinding of the  
26 19 operator is not feasible. However, the primary outcome measure is the presence of  
27 20 the inflection on the expired capnography curve to ensure that the ET is in the  
28 21 tracheal position. The main outcome of other studies was the duration of the  
29 22 intubation attempt. For detailed information about the overall intubation time, we  
30 23 divide the overall time into three time periods, from insertion of the laryngoscope until  
31 24 the first ventilation. The visualisation of the glottis is another preferred outcome  
32 25 parameter in several airway studies, but a good view of the glottis cannot be  
33 26 associated with successful or faster tracheal intubation.<sup>21,22</sup> Furthermore, the number  
34 27 of attempts constitutes a relevant factor for increased airway complications (e.g., risk  
35 28 of aspiration, tissue/ mucosal damage) and desaturation during the intubation  
36 29 process.<sup>15-17</sup>  
37  
38  
39  
40  
41  
42  
43  
44  
45  
46  
47  
48  
49  
50

51  
52  
53 31 In conclusion, if our main hypothesis is confirmed, video laryngoscopy might become  
54 32 the reference standard in the operating room. The expected benefits of this practice  
55 33 include improved instruction of airway management and influence of neuromuscular  
56  
57  
58  
59  
60

1 agents for the intubation procedure as well as improved patient safety in terms of  
2 decreased airway complications (e.g., hypoxemia, aspiration).

### 4 **Acknowledgements**

5 The authors wish to thank Irene Schmidtman (Institute of Medical Biostatistics,  
6 Epidemiology and Informatics, University Medical Centre of the Johannes Gutenberg-  
7 University, Mainz, Germany). We are also grateful to all of the participants in the  
8 study.

### 10 **Contributors**

11 MK and RN designed the trial and prepared the manuscript. TP, IT and CA  
12 participated in designing the EMMA trial. IS wrote the statistical analysis plan and  
13 estimated the sample size. None of the authors have financial interests or received  
14 honoraria or paid expert testimony. None of the authors have any personal  
15 relationships with people or organisations that could inappropriately influence (bias)  
16 this work. The authors alone are responsible for the content and writing of the paper.

### 18 **Funding and competing interests**

19 No funding or competing interests are declared.

### 21 **Patient consent**

22 Obtained.

### 25 **REFERENCES**

- 26 1. Chan AW, Tetzlaff JM, Gotzsche PC, Altman DG, Mann H, Berlin JA, et al.  
27 SPIRIT 2013 explanation and elaboration: guidance for protocols of clinical  
28 trials. *BMJ* 2013;346:7586.
- 29 2. Mulcaster JT, Mills J, Hung OR, MacQuarrie K, Law JA, Pytka S, et al.  
30 Laryngoscopic intubation: learning and performance. *Anesthesiol* 2003;98:23-  
31 7.

- 1  
2  
3 1 3. Konrad C, Schupfer G, Wietlisbach M, Gerber H. Learning manual skills in  
4  
5 2 anesthesiology: Is there a recommended number of cases for anesthetic  
6  
7 3 procedures? *Anesth analg* 1998;86:635-9.
- 8 4 4. Silverberg MJ, Li N, Acquah SO, Kory PD. Comparison of video laryngoscopy  
9  
10 5 versus direct laryngoscopy during urgent endotracheal intubation: a  
11  
12 6 randomized controlled trial. *Crit Care* 2015;43:636-41.
- 13 7 5. Park S. O., Kim J. W., Na J. H., Lee K. H., Lee K. R., Hong D. Y., et al. Video  
14  
15 8 laryngoscopy improves the first-attempt success in endotracheal intubation  
16  
17 9 during cardiopulmonary resuscitation among novice physicians. *Resuscitation*  
18  
19 10 2015;89:188-94.
- 20 11 6. Ahmadi K, Ebrahimi M, Hashemian AM, Sarshar S, Rahimi-Movaghar V.  
21  
22 12 GlideScope Video Laryngoscope for Difficult Intubation in Emergency Patients:  
23  
24 13 a Quasi-Randomized Controlled Trial. *Acta Med Iran* 2015;53:738-42.
- 25 14 7. Mosier JM, Whitmore SP, Bloom JW, Snyder LS, Graham LA, Carr GE, et al.  
26  
27 15 Video laryngoscopy improves intubation success and reduces esophageal  
28  
29 16 intubations compared to direct laryngoscopy in the medical intensive care unit.  
30  
31 17 *Crit Care* 2013;17:R237.
- 32 18 8. Sakles J. C., Mosier J. M., Chiu S., Keim S. M. Tracheal Intubation in the  
33  
34 19 Emergency Department: A Comparison of GlideScope® Video Laryngoscopy  
35  
36 20 to Direct Laryngoscopy in 822 Intubations. *J Emerg Med* 2011;42:400-5.
- 37 21 9. Yeatts DJ, Dutton RP, Hu PF, Chang YW, Brown CH, Chen H, et al. Effect of  
38  
39 22 video laryngoscopy on trauma patient survival: a randomized controlled trial. *J*  
40  
41 23 *Trauma Acute Care Surg* 2013;75:212-9.
- 42 24 10. Noppens RR, Geimer S, Eisel N, David M, Piepho T. Endotracheal intubation  
43  
44 25 using the C-MAC® video laryngoscope or the Macintosh laryngoscope: A  
45  
46 26 prospective, comparative study in the ICU. *Crit Care* 2012;16:R103.
- 47 27 11. Kory P, Guevarra K, Mathew JP, Hegde A, Mayo PH. The impact of video  
48  
49 28 laryngoscopy use during urgent endotracheal intubation in the critically ill.  
50  
51 29 *Anesth Analg* 2013;117:144-9.
- 52 30 12. Piepho T., Fortmueller K., Heid F. M., Schmidtmann I., Werner C., Noppens R.  
53  
54 31 R. Performance of the C-MAC video laryngoscope in patients after a limited  
55  
56 32 glottic view using Macintosh laryngoscopy. *Anaesthesia* 2011;66:1101-5.

- 1  
2  
3 1 13. Michailidou M, O'Keeffe T, Mosier JM, Friese RS, Joseph B, Rhee P, et al. A  
4 2 comparison of video laryngoscopy to direct laryngoscopy for the emergency  
5 3 intubation of trauma patients. *World J Surg* 2015;39:782-788.  
6  
7  
8 4 14. Cavus E, Thee C, Moeller T, Kieckhaefer J, Doerges V, Wagner K. A  
9 5 randomised, controlled crossover comparison of the C-MAC video-  
10 6 laryngoscope with direct laryngoscopy in 150 patients during routine induction  
11 7 of anaesthesia. *BMC Anesthesiol* 2011;11:6.  
12  
13  
14 8 15. Lee RA, van Zundert AAJ, Maass en RLJG, Wieringa PA. Forces applied to  
15 9 the maxillary incisors by videolaryngoscopes and the Macintosh laryngoscope.  
16 10 *Acta Anaesthesiol Scand* 2012;56(2):224–9.  
17  
18  
19 11 16. Mort TC. Emergency tracheal intubation: complications associated with  
20 12 repeated laryngoscopic attempts. *Anesth Analg* 2004;99:607-13.  
21  
22  
23 13 17. Hasegawa K, Shigemitsu K, Hagiwara Y, Chiba T et al. Association between  
24 14 repeated intubation attempts and adverse events in emergency departments:  
25 15 an analysis of a multicenter prospective observational study. *Ann Emerg Med*  
26 16 2012;60:749-54.  
27  
28  
29 17 18. Sakles JC, Chiu S, Mosier J, Walker C, Stolz U. The importance of first pass  
30 18 success when performing orotracheal intubation in the emergency department.  
31 19 *Acad Emerg Med* 2013;20:71-8.  
32  
33  
34 20 19. Noppens R.R, Mobus S, Heid F, Schmidtman I, Werner C, Piepho T.  
35 21 Evaluation of the McGrath Series 5 videolaryngoscope after failed direct  
36 22 laryngoscopy. *Anaesthesia* 2010;65:716-20.  
37  
38  
39 23 20. Kaplan A, Goksu E, Yildiz G, Kilic T. Comparison of the C-MAC  
40 24 Videolaryngoscope and Rigid Fiberscope with Direct Laryngoscopy in Easy  
41 25 and Difficult Airway Scenarios: A Manikin Study. *J Emerg Med* 2016;50:107-  
42 26 14.  
43  
44  
45 27 21. Ruetzler K, Imach S, Weiss M, Haas T, Schmidt AR. Comparison of five video  
46 28 laryngoscopes and conventional direct laryngoscopy : Investigations on simple  
47 29 and simulated difficult airways on the intubation trainer. *Anaesthesist*  
48 30 2015;64:513-9.  
49  
50  
51 31 22. Savoldelli GL, Schiffer E, Abegg C, Baeriswyl V, Clergue F, Waeber JL.  
52 32 Comparison of the Glidescope, the McGrath, the Airtraq and the Macintosh  
53 33 laryngoscopes in simulated difficult airways. *Anaesthesia* 2008;63:1358-64.  
54  
55  
56  
57  
58  
59  
60

- 1  
2  
3 1 23. Aziz MF, Abrons RO, Cattano D, Bayman EO, Swanson DE, Hagberg CA,  
4 Todd MM, Brambrink AM. First-Attempt Intubation Success of Video  
5 Laryngoscopy on Patients with Anticipated Difficult Direct Laryngoscopy: A  
6 Multicenter Randomized Controlled Trial Comparing the C-MAC D-Blade  
7 Versus the GlideScope in a Mixed Provider and Diverse Patient Population.  
8 *Anesth Analg* 2016;122:740-50.  
9  
10 11 24. Piepho T, Weinert K, Heid FM, Werner C, Noppens RR. Comparison of the  
12 McGrath® Series 5 and GlideScope® Ranger with the Macintosh  
13 laryngoscope by paramedics. *Scand J Trauma Resusc Emerg Med.*  
14 2011;19:4.  
15  
16 17 25. Savoldelli GL, Schiffer E, Abegg C, Baeriswyl V, Clergue F, Waeber JL.  
18 Learning curves of the Glidescope, the McGrath and the Airtraq  
19 laryngoscopes: a manikin study. *Eur J Anaesthesiol* 2009;26:554-8.  
20  
21 22 26. Lewis SR, Butler AR, Parker J, Cook TM, Smith AF. Videolaryngoscopy versus  
23 direct laryngoscopy for adult patients requiring tracheal intubation. *Cochrane*  
24 *Database Syst Rev* 2016.15;11.  
25  
26 27 27. Wallace CD, Foulds LT, McLeod GA, Younger RA, McGuire BE. A comparison  
28 of the ease of tracheal intubation using a McGrath® laryngoscope and a  
29 standard Macintosh laryngoscope. *Anaesthesia* 2015;70:1281-5.  
30  
31 32 28. Bailly A, Lascarrou JB. McGrath videolaryngoscope versus Macintosh  
33 laryngoscope for orotracheal intubation in intensive care patients: the  
34 randomised multicentre MACMAN trial study protocol. *BMJ Open*  
35 2015;5:e009855.  
36  
37 38 29. McCrory JW, Matthews JN. Comparison of four methods of preoxygenation.  
39 *Brit J Anaesth* 1990;64:571-6.  
40  
41 42 30. Tanoubi I, Drolet P, Donati F. Optimizing preoxygenation in adults. *Can J*  
43 *Anaesth* 2009;56:449-66.  
44  
45 46 31. Murphy C, Wong DT. Airway management and oxygenation in obese patients.  
47 *Can J Anaesth* 2013;60:929-45.  
48  
49 50 32. Piepho T, Cavus E, Noppens R, Byhahn C, Dorges V, Zwissler B, et al. S1  
51 guidelines on airway management : Guideline of the German Society of  
52 Anesthesiology and Intensive Care Medicine. *Anaesthesist* 2015;64:27-40.  
53  
54 55 33. Adnet F., Borron S. W., Racine S. X., Clemessy J. L., Fournier J. L., Plaisance  
56 P., et al. The intubation difficulty scale (IDS): proposal and evaluation of a new  
57  
58  
59  
60

1  
2  
3  
4  
5  
6  
7  
8  
9  
10  
11  
12  
13  
14  
15  
16  
17  
18  
19  
20  
21  
22  
23  
24  
25  
26  
27  
28  
29  
30  
31  
32  
33  
34  
35  
36  
37  
38  
39  
40  
41  
42  
43  
44  
45  
46  
47  
48  
49  
50  
51  
52  
53  
54  
55  
56  
57  
58  
59  
60

- 1 score characterizing the complexity of endotracheal intubation. *Anesthesiology*
- 2 1997;87:1290-7.
- 3 34. Weiss M, Schwarz U, Gerber AC. Difficult airway management: comparison of
- 4 the Bullard laryngoscope with the video-optical intubation stylet. *Can J Anesth*
- 5 2000;47:280-284.
- 6 35. Makwana HD, Suthar NN, Gajjar MP, Thakor AV. Developing competency in
- 7 interns for endotracheal intubation: An educational article. *Int J App Basic Med*
- 8 2016;6:201-204.
- 9 36. Janssens M.; Lamy, M. Airway Difficulty Score (ADS): a new score to predict
- 10 difficulty in airway management. *Eur J Anaesthesiol* 2000;17:35.
- 11 37. Purugganan RV, Jackson TA, Heir JS, Wang H, Cata JP. Video laryngoscopy
- 12 versus direct laryngoscopy for double-lumen endotracheal tube intubation: a
- 13 retrospective analysis. *J Cardiothorac Vasc Anesth* 2012;26:845-848.
- 14 38. Kasuya Y, Takahashi E, Nagai M, Ozaki M. Comparison of Tracheal Intubation
- 15 Performance between Macintosh Direct Laryngoscope and McGrath® MAC
- 16 Video Laryngoscope among Anesthesia Trainees. *Masui* 2015;64:1291-1296.

## TABLE AND FIGURE

Figure 1. Study flow-chart.

Table 1. Recapitulation of previous studies on endotracheal intubation with video laryngoscopy in different study setting.

Table 2. Participant timeline.



Figure 1: Study flow-chart

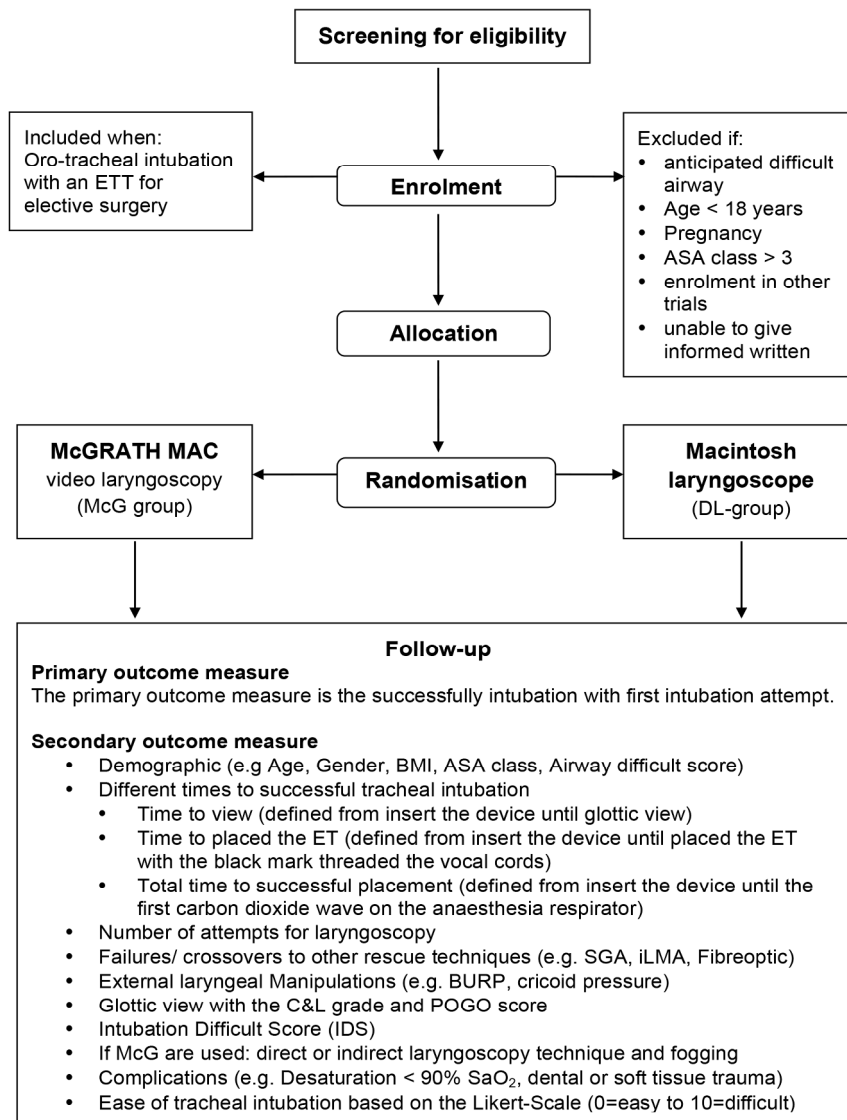

Study flow-chart

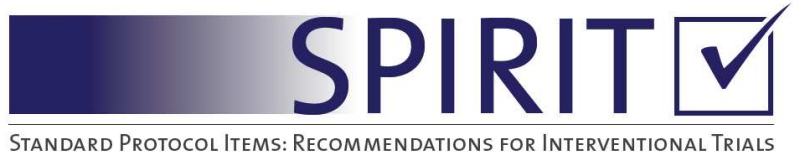

1  
2  
3  
4  
5  
6  
7  
8  
9  
10  
11  
12  
13  
14  
15  
16  
17  
18  
19  
20  
21  
22  
23  
24  
25  
26  
27  
28  
29  
30  
31  
32  
33  
34  
35  
36  
37  
38  
39  
40  
41  
42  
43  
44  
45  
46  
47  
48  
49

SPIRIT 2013 Checklist: Recommended items to address in a clinical trial protocol and related documents\*

| Section/item                      | Item No | Description                                                                                                                                                                                                                                                                              | Addressed on page number |
|-----------------------------------|---------|------------------------------------------------------------------------------------------------------------------------------------------------------------------------------------------------------------------------------------------------------------------------------------------|--------------------------|
| <b>Administrative information</b> |         |                                                                                                                                                                                                                                                                                          |                          |
| Title                             | 1       | Descriptive title identifying the study design, population, interventions, and, if applicable, trial acronym                                                                                                                                                                             | 1 _____                  |
| Trial registration                | 2a      | Trial identifier and registry name. If not yet registered, name of intended registry                                                                                                                                                                                                     | 4,17 _____               |
|                                   | 2b      | All items from the World Health Organization Trial Registration Data Set                                                                                                                                                                                                                 | n/a _____                |
| Protocol version                  | 3       | Date and version identifier                                                                                                                                                                                                                                                              | 17 _____                 |
| Funding                           | 4       | Sources and types of financial, material, and other support                                                                                                                                                                                                                              | 19 _____                 |
| Roles and responsibilities        | 5a      | Names, affiliations, and roles of protocol contributors                                                                                                                                                                                                                                  | 1,19 _____               |
|                                   | 5b      | Name and contact information for the trial sponsor                                                                                                                                                                                                                                       | 1-2 _____                |
|                                   | 5c      | Role of study sponsor and funders, if any, in study design; collection, management, analysis, and interpretation of data; writing of the report; and the decision to submit the report for publication, including whether they will have ultimate authority over any of these activities | 1,19 _____               |
|                                   | 5d      | Composition, roles, and responsibilities of the coordinating centre, steering committee, endpoint adjudication committee, data management team, and other individuals or groups overseeing the trial, if applicable (see Item 21a for data monitoring committee)                         | 17-19 _____              |

1  
2  
3 **Introduction**  
4

|                  |    |                                                                                                               |          |
|------------------|----|---------------------------------------------------------------------------------------------------------------|----------|
| 5 Background and | 6a | Description of research question and justification for undertaking the trial, including summary of relevant   | 5,6_____ |
| 6 rationale      |    | studies (published and unpublished) examining benefits and harms for each intervention                        |          |
| 7                |    |                                                                                                               |          |
| 8                | 6b | Explanation for choice of comparators                                                                         | 5,6_____ |
| 9                |    |                                                                                                               |          |
| 10 Objectives    | 7  | Specific objectives or hypotheses                                                                             | 6_____   |
| 11               |    |                                                                                                               |          |
| 12 Trial design  | 8  | Description of trial design including type of trial (eg, parallel group, crossover, factorial, single group), |          |
| 13               |    | allocation ratio, and framework (eg, superiority, equivalence, noninferiority, exploratory)                   | 8_____   |
| 14               |    |                                                                                                               |          |

15  
16 **Methods: Participants, interventions, and outcomes**  
17

|                         |     |                                                                                                               |            |
|-------------------------|-----|---------------------------------------------------------------------------------------------------------------|------------|
| 18 Study setting        | 9   | Description of study settings (eg, community clinic, academic hospital) and list of countries where data will | 6,13_____  |
| 19                      |     | be collected. Reference to where list of study sites can be obtained                                          |            |
| 20                      |     |                                                                                                               |            |
| 21 Eligibility criteria | 10  | Inclusion and exclusion criteria for participants. If applicable, eligibility criteria for study centres and  | 8_____     |
| 22                      |     | individuals who will perform the interventions (eg, surgeons, psychotherapists)                               |            |
| 23                      |     |                                                                                                               |            |
| 24 Interventions        | 11a | Interventions for each group with sufficient detail to allow replication, including how and when they will be | 9-11_____  |
| 25                      |     | administered                                                                                                  |            |
| 26                      |     |                                                                                                               |            |
| 27                      | 11b | Criteria for discontinuing or modifying allocated interventions for a given trial participant (eg, drug dose  | n/a_____   |
| 28                      |     | change in response to harms, participant request, or improving/worsening disease)                             |            |
| 29                      |     |                                                                                                               |            |
| 30                      | 11c | Strategies to improve adherence to intervention protocols, and any procedures for monitoring adherence        | n/a_____   |
| 31                      |     | (eg, drug tablet return, laboratory tests)                                                                    |            |
| 32                      |     |                                                                                                               |            |
| 33                      | 11d | Relevant concomitant care and interventions that are permitted or prohibited during the trial                 | 9-11_____  |
| 34                      |     |                                                                                                               |            |
| 35 Outcomes             | 12  | Primary, secondary, and other outcomes, including the specific measurement variable (eg, systolic blood       | 11,12_____ |
| 36                      |     | pressure), analysis metric (eg, change from baseline, final value, time to event), method of aggregation (eg, |            |
| 37                      |     | median, proportion), and time point for each outcome. Explanation of the clinical relevance of chosen         |            |
| 38                      |     | efficacy and harm outcomes is strongly recommended                                                            |            |
| 39                      |     |                                                                                                               |            |
| 40                      |     |                                                                                                               |            |
| 41 Participant timeline | 13  | Time schedule of enrolment, interventions (including any run-ins and washouts), assessments, and visits for   | 12,13_____ |
| 42                      |     | participants. A schematic diagram is highly recommended (see Figure)                                          |            |
| 43                      |     |                                                                                                               |            |
| 44                      |     |                                                                                                               |            |
| 45                      |     |                                                                                                               |            |

1  
2  
3 Sample size 14 Estimated number of participants needed to achieve study objectives and how it was determined, including 16\_\_\_\_\_

4 clinical and statistical assumptions supporting any sample size calculations

5  
6 Recruitment 15 Strategies for achieving adequate participant enrolment to reach target sample size 12,13\_\_\_\_\_

7  
8 **Methods: Assignment of interventions (for controlled trials)**

9  
10 Allocation:

11  
12 Sequence generation 16a Method of generating the allocation sequence (eg, computer-generated random numbers), and list of any 14\_\_\_\_\_

13 factors for stratification. To reduce predictability of a random sequence, details of any planned restriction  
14 (eg, blocking) should be provided in a separate document that is unavailable to those who enrol participants  
15 or assign interventions

16  
17 Allocation concealment mechanism 16b Mechanism of implementing the allocation sequence (eg, central telephone; sequentially numbered, 14,15\_\_\_\_\_

18 opaque, sealed envelopes), describing any steps to conceal the sequence until interventions are assigned

19  
20 Implementation 16c Who will generate the allocation sequence, who will enrol participants, and who will assign participants to 16\_\_\_\_\_

21 interventions

22 Blinding (masking) 17a Who will be blinded after assignment to interventions (eg, trial participants, care providers, outcome 14\_\_\_\_\_

23 assessors, data analysts), and how

24  
25 17b If blinded, circumstances under which unblinding is permissible, and procedure for revealing a participant's 14\_\_\_\_\_

26 allocated intervention during the trial

27  
28  
29  
30  
31  
32 **Methods: Data collection, management, and analysis**

33  
34 Data collection methods 18a Plans for assessment and collection of outcome, baseline, and other trial data, including any related 6,9\_\_\_\_\_

35 processes to promote data quality (eg, duplicate measurements, training of assessors) and a description of  
36 study instruments (eg, questionnaires, laboratory tests) along with their reliability and validity, if known.  
37 Reference to where data collection forms can be found, if not in the protocol

38  
39 18b Plans to promote participant retention and complete follow-up, including list of any outcome data to be n/a\_\_\_\_\_

40 collected for participants who discontinue or deviate from intervention protocols

|    |                                 |     |                                                                                                                                                                                                                                                                                                                                       |            |
|----|---------------------------------|-----|---------------------------------------------------------------------------------------------------------------------------------------------------------------------------------------------------------------------------------------------------------------------------------------------------------------------------------------|------------|
| 1  |                                 |     |                                                                                                                                                                                                                                                                                                                                       |            |
| 2  |                                 |     |                                                                                                                                                                                                                                                                                                                                       |            |
| 3  | Data management                 | 19  | Plans for data entry, coding, security, and storage, including any related processes to promote data quality (eg, double data entry; range checks for data values). Reference to where details of data management procedures can be found, if not in the protocol                                                                     | 14,16_____ |
| 4  |                                 |     |                                                                                                                                                                                                                                                                                                                                       |            |
| 5  |                                 |     |                                                                                                                                                                                                                                                                                                                                       |            |
| 6  |                                 |     |                                                                                                                                                                                                                                                                                                                                       |            |
| 7  | Statistical methods             | 20a | Statistical methods for analysing primary and secondary outcomes. Reference to where other details of the statistical analysis plan can be found, if not in the protocol                                                                                                                                                              | 15_____    |
| 8  |                                 |     |                                                                                                                                                                                                                                                                                                                                       |            |
| 9  |                                 |     |                                                                                                                                                                                                                                                                                                                                       |            |
| 10 |                                 | 20b | Methods for any additional analyses (eg, subgroup and adjusted analyses)                                                                                                                                                                                                                                                              | 15_____    |
| 11 |                                 |     |                                                                                                                                                                                                                                                                                                                                       |            |
| 12 |                                 | 20c | Definition of analysis population relating to protocol non-adherence (eg, as randomised analysis), and any statistical methods to handle missing data (eg, multiple imputation)                                                                                                                                                       | n/a_____   |
| 13 |                                 |     |                                                                                                                                                                                                                                                                                                                                       |            |
| 14 |                                 |     |                                                                                                                                                                                                                                                                                                                                       |            |
| 15 |                                 |     |                                                                                                                                                                                                                                                                                                                                       |            |
| 16 | <b>Methods: Monitoring</b>      |     |                                                                                                                                                                                                                                                                                                                                       |            |
| 17 |                                 |     |                                                                                                                                                                                                                                                                                                                                       |            |
| 18 | Data monitoring                 | 21a | Composition of data monitoring committee (DMC); summary of its role and reporting structure; statement of whether it is independent from the sponsor and competing interests; and reference to where further details about its charter can be found, if not in the protocol. Alternatively, an explanation of why a DMC is not needed | n/a_____   |
| 19 |                                 |     |                                                                                                                                                                                                                                                                                                                                       |            |
| 20 |                                 |     |                                                                                                                                                                                                                                                                                                                                       |            |
| 21 |                                 |     |                                                                                                                                                                                                                                                                                                                                       |            |
| 22 |                                 |     |                                                                                                                                                                                                                                                                                                                                       |            |
| 23 |                                 | 21b | Description of any interim analyses and stopping guidelines, including who will have access to these interim results and make the final decision to terminate the trial                                                                                                                                                               | n/a_____   |
| 24 |                                 |     |                                                                                                                                                                                                                                                                                                                                       |            |
| 25 |                                 |     |                                                                                                                                                                                                                                                                                                                                       |            |
| 26 | Harms                           | 22  | Plans for collecting, assessing, reporting, and managing solicited and spontaneously reported adverse events and other unintended effects of trial interventions or trial conduct                                                                                                                                                     | 16,17_____ |
| 27 |                                 |     |                                                                                                                                                                                                                                                                                                                                       |            |
| 28 |                                 |     |                                                                                                                                                                                                                                                                                                                                       |            |
| 29 | Auditing                        | 23  | Frequency and procedures for auditing trial conduct, if any, and whether the process will be independent from investigators and the sponsor                                                                                                                                                                                           | 17_____    |
| 30 |                                 |     |                                                                                                                                                                                                                                                                                                                                       |            |
| 31 |                                 |     |                                                                                                                                                                                                                                                                                                                                       |            |
| 32 |                                 |     |                                                                                                                                                                                                                                                                                                                                       |            |
| 33 | <b>Ethics and dissemination</b> |     |                                                                                                                                                                                                                                                                                                                                       |            |
| 34 |                                 |     |                                                                                                                                                                                                                                                                                                                                       |            |
| 35 | Research ethics approval        | 24  | Plans for seeking research ethics committee/institutional review board (REC/IRB) approval                                                                                                                                                                                                                                             | 17_____    |
| 36 |                                 |     |                                                                                                                                                                                                                                                                                                                                       |            |
| 37 |                                 |     |                                                                                                                                                                                                                                                                                                                                       |            |
| 38 | Protocol amendments             | 25  | Plans for communicating important protocol modifications (eg, changes to eligibility criteria, outcomes, analyses) to relevant parties (eg, investigators, REC/IRBs, trial participants, trial registries, journals, regulators)                                                                                                      | n/a_____   |
| 39 |                                 |     |                                                                                                                                                                                                                                                                                                                                       |            |
| 40 |                                 |     |                                                                                                                                                                                                                                                                                                                                       |            |
| 41 |                                 |     |                                                                                                                                                                                                                                                                                                                                       |            |
| 42 |                                 |     |                                                                                                                                                                                                                                                                                                                                       |            |
| 43 |                                 |     |                                                                                                                                                                                                                                                                                                                                       |            |
| 44 |                                 |     |                                                                                                                                                                                                                                                                                                                                       |            |
| 45 |                                 |     |                                                                                                                                                                                                                                                                                                                                       |            |
| 46 |                                 |     |                                                                                                                                                                                                                                                                                                                                       |            |
| 47 |                                 |     |                                                                                                                                                                                                                                                                                                                                       |            |
| 48 |                                 |     |                                                                                                                                                                                                                                                                                                                                       |            |
| 49 |                                 |     |                                                                                                                                                                                                                                                                                                                                       |            |

|    |                               |     |                                                                                                                                                                                                                                                                                     |            |
|----|-------------------------------|-----|-------------------------------------------------------------------------------------------------------------------------------------------------------------------------------------------------------------------------------------------------------------------------------------|------------|
| 1  |                               |     |                                                                                                                                                                                                                                                                                     |            |
| 2  |                               |     |                                                                                                                                                                                                                                                                                     |            |
| 3  | Consent or assent             | 26a | Who will obtain informed consent or assent from potential trial participants or authorised surrogates, and how (see Item 32)                                                                                                                                                        | 13-14_____ |
| 4  |                               |     |                                                                                                                                                                                                                                                                                     |            |
| 5  |                               |     |                                                                                                                                                                                                                                                                                     |            |
| 6  |                               | 26b | Additional consent provisions for collection and use of participant data and biological specimens in ancillary studies, if applicable                                                                                                                                               | n/a_____   |
| 7  |                               |     |                                                                                                                                                                                                                                                                                     |            |
| 8  |                               |     |                                                                                                                                                                                                                                                                                     |            |
| 9  | Confidentiality               | 27  | How personal information about potential and enrolled participants will be collected, shared, and maintained in order to protect confidentiality before, during, and after the trial                                                                                                | 14_____    |
| 10 |                               |     |                                                                                                                                                                                                                                                                                     |            |
| 11 |                               |     |                                                                                                                                                                                                                                                                                     |            |
| 12 | Declaration of interests      | 28  | Financial and other competing interests for principal investigators for the overall trial and each study site                                                                                                                                                                       | 17,19_____ |
| 13 |                               |     |                                                                                                                                                                                                                                                                                     |            |
| 14 |                               |     |                                                                                                                                                                                                                                                                                     |            |
| 15 | Access to data                | 29  | Statement of who will have access to the final trial dataset, and disclosure of contractual agreements that limit such access for investigators                                                                                                                                     | 14_____    |
| 16 |                               |     |                                                                                                                                                                                                                                                                                     |            |
| 17 |                               |     |                                                                                                                                                                                                                                                                                     |            |
| 18 | Ancillary and post-trial care | 30  | Provisions, if any, for ancillary and post-trial care, and for compensation to those who suffer harm from trial participation                                                                                                                                                       | n/a_____   |
| 19 |                               |     |                                                                                                                                                                                                                                                                                     |            |
| 20 |                               |     |                                                                                                                                                                                                                                                                                     |            |
| 21 | Dissemination policy          | 31a | Plans for investigators and sponsor to communicate trial results to participants, healthcare professionals, the public, and other relevant groups (eg, via publication, reporting in results databases, or other data sharing arrangements), including any publication restrictions | n/a_____   |
| 22 |                               |     |                                                                                                                                                                                                                                                                                     |            |
| 23 |                               |     |                                                                                                                                                                                                                                                                                     |            |
| 24 |                               |     |                                                                                                                                                                                                                                                                                     |            |
| 25 |                               |     |                                                                                                                                                                                                                                                                                     |            |
| 26 |                               | 31b | Authorship eligibility guidelines and any intended use of professional writers                                                                                                                                                                                                      | n/a_____   |
| 27 |                               |     |                                                                                                                                                                                                                                                                                     |            |
| 28 |                               | 31c | Plans, if any, for granting public access to the full protocol, participant-level dataset, and statistical code                                                                                                                                                                     | n/a_____   |
| 29 |                               |     |                                                                                                                                                                                                                                                                                     |            |
| 30 | <b>Appendices</b>             |     |                                                                                                                                                                                                                                                                                     |            |
| 31 |                               |     |                                                                                                                                                                                                                                                                                     |            |
| 32 | Informed consent materials    | 32  | Model consent form and other related documentation given to participants and authorised surrogates                                                                                                                                                                                  | n/a_____   |
| 33 |                               |     |                                                                                                                                                                                                                                                                                     |            |
| 34 |                               |     |                                                                                                                                                                                                                                                                                     |            |
| 35 | Biological specimens          | 33  | Plans for collection, laboratory evaluation, and storage of biological specimens for genetic or molecular analysis in the current trial and for future use in ancillary studies, if applicable                                                                                      | n/a_____   |
| 36 |                               |     |                                                                                                                                                                                                                                                                                     |            |
| 37 |                               |     |                                                                                                                                                                                                                                                                                     |            |

\*It is strongly recommended that this checklist be read in conjunction with the SPIRIT 2013 Explanation & Elaboration for important clarification on the items. Amendments to the protocol should be tracked and dated. The SPIRIT checklist is copyrighted by the SPIRIT Group under the Creative Commons "[Attribution-NonCommercial-NoDerivs 3.0 Unported](https://creativecommons.org/licenses/by-nc-nd/3.0/)" license.

# BMJ Open

## Evaluation of the McGrath MAC and Macintosh Laryngoscope for tracheal intubation in 2000 patients undergoing general anaesthesia: The randomised multicentre EMMA trial study protocol

|                                 |                                                                                                                                                                                                                                                                                                                                                                                                                                                                                                                                                                                    |
|---------------------------------|------------------------------------------------------------------------------------------------------------------------------------------------------------------------------------------------------------------------------------------------------------------------------------------------------------------------------------------------------------------------------------------------------------------------------------------------------------------------------------------------------------------------------------------------------------------------------------|
| Journal:                        | <i>BMJ Open</i>                                                                                                                                                                                                                                                                                                                                                                                                                                                                                                                                                                    |
| Manuscript ID                   | bmjopen-2017-016907.R1                                                                                                                                                                                                                                                                                                                                                                                                                                                                                                                                                             |
| Article Type:                   | Protocol                                                                                                                                                                                                                                                                                                                                                                                                                                                                                                                                                                           |
| Date Submitted by the Author:   | 29-May-2017                                                                                                                                                                                                                                                                                                                                                                                                                                                                                                                                                                        |
| Complete List of Authors:       | Kriege, Marc; Johannes Gutenberg Univ Mainz, Anaesthesiology Alflen, Christian; Johannes Gutenberg Univ Mainz, Anaesthesiology Tzanova, Irene<br>Schmidtman, Irene; Johannes Gutenberg Universitat Mainz, Institute of Medical Biostatistics, Epidemiology and Informatics, University Medical Piepho, Tim; Johannes Gutenberg Universitat Universitatsmedizin, Anesthesiology; Bruderkrankenhaus Trier, Anesthesiology<br>Noppens, Ruediger; Western University, Dept. of Anesthesia & Perioperative Medicine; Johannes Gutenberg Universitat Universitatsmedizin, Anesthesiology |
| <b>Primary Subject Heading</b>: | Anaesthesia                                                                                                                                                                                                                                                                                                                                                                                                                                                                                                                                                                        |
| Secondary Subject Heading:      | Anaesthesia                                                                                                                                                                                                                                                                                                                                                                                                                                                                                                                                                                        |
| Keywords:                       | Adult anaesthesia < ANAESTHETICS, Airway Management, Video laryngoscope, Macintosh Laryngoscope, Difficult Airway, Intubation                                                                                                                                                                                                                                                                                                                                                                                                                                                      |
|                                 |                                                                                                                                                                                                                                                                                                                                                                                                                                                                                                                                                                                    |

SCHOLARONE™  
Manuscripts

## Anaesthesia – Protocol

# **Evaluation of the McGrath MAC<sup>®</sup> and Macintosh Laryngoscope for tracheal intubation in 2000 patients undergoing general anaesthesia: The randomised multicentre EMMA trial study protocol**

Marc Kriege,<sup>1</sup> Christian Alflen,<sup>1</sup> Irene Tzanova,<sup>2</sup> Irene Schmidtman,<sup>3</sup> Tim Piepho,<sup>1</sup>  
Ruediger R. Noppens<sup>1,4\*</sup>

### **Author Affiliations**

<sup>1</sup> Department of Anaesthesiology, University Medical Centre of the Johannes Gutenberg-University, Mainz, Germany

<sup>2</sup> Department of Anaesthesiology, Christophorus- Hospital, Coesfeld, Germany

<sup>3</sup> Institute of Medical Biostatistics, Epidemiology and Informatics, University Medical Centre of the Johannes Gutenberg-University, Mainz, Germany

<sup>4</sup> Department of Anesthesia & Perioperative Medicine, Western University, Canada

Marc Kriege, MD: makriege@uni-mainz.de

Christian Alflen, MD: Christian@alflen.net

Irene Tzanova, MD: Irene\_Tzanova@christophorus-kliniken.de

Irene Schmidtman, Sc.D: ischmidt@uni-mainz.de

Tim Piepho, MD, PhD: piepho@uni-mainz.de

Rüdiger R. Noppens, MD, PhD: ruediger.noppens@lhsc.on.ca



**Corresponding author:**

Ruediger R. Noppens, MD, PhD, FRCPC

Department of Anesthesia & Perioperative Medicine

LHSC- University Hospital

Western University, London, ON, Canada

339 Windermere Road

London, Ontario, N6A 5A5

Canada

**Email: [ruediger.noppens@lhsc.on.ca](mailto:ruediger.noppens@lhsc.on.ca)**

**ABSTRACT**

**Introduction:** The direct laryngoscopy technique using a Macintosh blade is the first choice globally for most anaesthetists. In case of an unanticipated difficult airway, the complication rate increases with the number of intubation attempts. Recently, McGrath MAC<sup>®</sup> (McGrath) video laryngoscopy has become a widely accepted method for securing an airway by tracheal intubation because it allows the visualisation of the glottis without a direct line of sight. Several studies and case reports have highlighted the benefit of the video laryngoscope in the visualisation of the glottis and found it to be superior in difficult intubation situations. The aim of this study was to compare the first-pass intubation success rate using the (McGrath) video laryngoscope compared with conventional direct laryngoscopy in surgical patients.

**Methods and analysis:** The EMMA trial is a multicentre, open-label, patient-blinded, randomised controlled trial. Consecutive patients requiring tracheal intubation are randomly allocated to either the McGrath video laryngoscope or direct laryngoscopy using the Macintosh laryngoscope. The expected rate of successful first-pass intubation is 95% in the McGrath group and 90% in the Macintosh group. Each group must include a total of 1000 patients to achieve 96% power for detecting a difference at the 5% significance level. Successful intubation with the first attempt is the primary endpoint. The secondary endpoints are the time to intubation, attempts for successful intubation, the necessity of alternatives, visualisation of the glottis using the Cormack & Lehane score and percentage of glottic opening score and definite complications.

**Ethics and dissemination:** The project was approved by the local ethics committee of the Medical Association of the Rhineland Palatine state and Westphalia-Lippe. The results of this study will be made available in the form of manuscripts for publication and presentations at national and international meetings.

**Trial registration:** ClinicalTrials.gov NCT 02611986.

### Strengths and limitations of this study

- This trial aims to determine whether video laryngoscopy is superior to direct laryngoscopy in daily anaesthesia practice.
- The plan is to include 2000 patients in this multicentre, open-label, randomised controlled superiority study.
- All training levels of anaesthesiologists (trainee, specialist, expert) are included.
- Selected patients with an expected normal airway are evaluated.
- One type of video laryngoscope using a Macintosh-like blade is evaluated. The results cannot be transferred to other kinds of video laryngoscopes (e.g., hyperangulated blade, channelled blade).

peer review only

## INTRODUCTION

### Background and rationale

(A) Securing the airway by tracheal intubation with direct laryngoscopy is an established and preferred technique in emergency settings and clinical anaesthesia practice. The limitations of direct laryngoscopy are well known. To achieve a learning curve with a 90% probability of performing a successful intubation, more than 57 attempts are required to develop enough experience with the technique.<sup>1,2</sup> To obtain optimal visualisation of the glottis, direct laryngoscopy requires alignment of the oropharyngeal-laryngeal axes.

However, the first-pass success rate of intubation in emergency settings ranges from 40 to 80%,<sup>3-7</sup> in intensive care units from 55 to 68%<sup>8-10</sup> and in the operating room from 63 to 85%.<sup>11-14</sup> Several studies have shown a correlation between increased complications and more than two intubation attempts.<sup>15-17</sup>

Indirect video laryngoscopy has become a widely accepted method for learning the techniques of airway management because it enables an optimised view of the glottis without a direct line of sight.<sup>18-20</sup> Thus, video laryngoscopy plays an important role in the management of patients with unanticipated airway difficulties or failed tracheal intubation. The use of video laryngoscopy is associated with a reduction in airway complications in clinical emergency and anaesthesia practice.<sup>17,21</sup> Despite the optimised visualisation of the glottis, the duration of tracheal intubation can be prolonged, and intubation attempts can fail.<sup>20-23</sup> Compared to direct laryngoscopy, the learning curve associated with the video laryngoscope is steep.<sup>24</sup> Video laryngoscopy varies in the design of the curved or angulated blade, mobility, size of the monitor display and operation of the micro camera on the blade.

Over the last 10 years, several studies have compared different video laryngoscopes to direct laryngoscopy or to each other, focusing on endotracheal intubation (ET) in emergency settings or in patients undergoing elective surgery in an operating room. The results suggested advantages in superior visualisation of the glottis,<sup>18,20,22</sup> a higher first-pass success rate<sup>3,10,18,23</sup>, and reduction of airway complications as well as benefits in those patients with a difficult airway.<sup>20-22</sup> However, most of these studies had methodological weaknesses, including studies with small sample sizes,<sup>5,12,18-20,23</sup> evaluation in intensive care units<sup>3,6,9,10,25,26</sup> or emergency departments,<sup>4,5,7</sup> manikin studies<sup>19,20</sup> and inclusion of patients who were anticipated to have a difficult airway.<sup>11,18-22</sup>

1  
2  
3 Studies conducted more recently have suggested advantages with video  
4 laryngoscopy but either failed to routinely use neuromuscular blockade,<sup>3</sup> in  
5 contraindication to current guidelines, or included patients with highly specific  
6 characteristics.<sup>4,7</sup> Special study characteristics are listed in Table 1.  
7  
8  
9

10  
11 (B) We chose to study the McGrath<sup>®</sup> MAC (McGrath; Covidien, Dublin, Ireland) video  
12 laryngoscope because it is a portable, relatively inexpensive device with a Macintosh-  
13 based blade similar to that in the Macintosh laryngoscope (DL; Stoss Medica,  
14 Wiesbaden, Germany). It therefore provides both a direct view of the glottis and an  
15 indirect view on the monitor display, which can be beneficial in the case of  
16 oropharyngeal mismatch. Our specific choice of the McGrath video laryngoscope was  
17 based on the following considerations:  
18  
19  
20  
21  
22

- 23 • The Macintosh-based curved blade of the McGrath is comparable to the  
24 Macintosh blade;
- 25 • The video display of the McGrath allows visualisation of the glottis by the  
26 operator along with study measurement or teaching by a consultant when  
27 tracheal intubation is performed by an inexperienced provider; and
- 28 • The McGrath is available with a disposable blade in different sizes and allows  
29 a swift change to treat more patients consecutively.  
30  
31  
32  
33

34  
35 The aim of this study is to evaluate whether the use of the McGrath improves the  
36 first-pass success rate compared with the DL in surgical patients with an expected  
37 normal airway undergoing general anaesthesia. We hypothesise that tracheal  
38 intubation using the McGrath decreases the frequency of failed intubation and airway  
39 complications.  
40  
41  
42  
43  
44  
45  
46  
47  
48  
49  
50  
51  
52  
53  
54  
55  
56  
57  
58  
59  
60

**Table 1. Recapitulation of previous studies on endotracheal intubation with videolaryngoscopy in different study settings.**

| First author                                                                           | Device                           | Operators                                    | Centre     | Design         | N   | First-pass Success (DL vs. VL)                       | p value | Comments      |
|----------------------------------------------------------------------------------------|----------------------------------|----------------------------------------------|------------|----------------|-----|------------------------------------------------------|---------|---------------|
| <i>Data shown a higher First-pass Success rate with the Videolaryngoscopy</i>          |                                  |                                              |            |                |     |                                                      |         |               |
| Silverberg et al. <sup>3</sup>                                                         | GS                               | Attending's                                  | Monocentre | Randomised     | 117 | 40% vs. 74%                                          | < 0.001 | ICU           |
| Park et al. <sup>4</sup>                                                               | GS                               | Non-anaesthesiologists                       | Monocentre | Randomised     | 82  | 55.9% vs. 91.8%                                      | < 0.001 | ED            |
| Ahmadi et al. <sup>5</sup>                                                             | GS                               | Residents                                    | Monocentre | Randomised     | 97  | 60.9% vs. 87.5%                                      | 0.036   | ED            |
| Mosier et al. <sup>8</sup>                                                             | GS, CMAC                         | Non- anaesthesiologists residents/ attending | Monocentre | Non-randomised | 234 | 60.7% vs 78.6%                                       | 0.009   | ICU           |
| Sakles et al. <sup>6</sup>                                                             | GS                               | Resident                                     | Monocentre | Randomised     | 822 | 57% vs. 75%                                          | 0.03    | ED            |
| Noppens et al. <sup>9</sup>                                                            | CMAC                             | Residents                                    | Monocentre | Prospective    | 274 | 55% vs. 79%                                          | 0.03    | ICU           |
| Kory et al. <sup>10</sup>                                                              | GS                               | Non- anaesthesiologists                      | Monocentre | Retrospective  | 128 | 68% vs. 91%                                          | 0.01    | ICU           |
| Noppens et al. <sup>18</sup>                                                           | McGrath S5                       | Residents                                    | Monocentre | Prospective    | 67  | 69% vs. 95%                                          | < 0.001 |               |
| Savoldelli et al. <sup>21</sup>                                                        | GS, McGrath S5, Airtraq          | Mixed                                        | Monocentre | Randomised     | 60  | 63% vs. 88% vs. 100% vs. 88%                         | < 0.001 | Manikin-study |
| Kasuya et al. <sup>37</sup>                                                            | McGrath                          | Anesthesia trainees                          | Monocentre | NR             | NR  | 78.6% vs. 92.8%                                      | < 0.001 |               |
| <i>Data shown a similar or higher First-pass Success rate with Direct Laryngoscopy</i> |                                  |                                              |            |                |     |                                                      |         |               |
| Yeatts et al. <sup>7</sup>                                                             | GS                               | Mixed                                        | Monocentre | Randomised     | 623 | 80% vs. 81%                                          | 0.46    | ED            |
| Piepho et al. <sup>11</sup>                                                            | CMAC                             | Residents                                    | Monocentre | Prospective    | 52  | 79% vs. 81%                                          | 0.8     |               |
| Ruetzler et al. <sup>20</sup>                                                          | CMAC,GS, McGrath S5, KV, Airtraq | Mixed                                        | Monocentre | Randomised     | 27  | 96.7% vs. 100% vs. 44.4% vs. 77.8 vs. 88.9% vs. 100% | < 0.001 | Manikin-study |
| Piepho et al. <sup>23</sup>                                                            | McGrath S5, GS                   | Paramedics                                   | Monocentre | Randomised     | 30  | 94.4% vs. 97.7%                                      | > 0.05  | Manikin-study |
| Purugganan et al. <sup>36</sup>                                                        | McGrath, C-MAC                   | Residents                                    | Monocentre | Randomised     | 130 | 95% vs. 87% vs. 91%                                  | 0.4     |               |

Mixed (Residents/ Attending's); ED (Emergency Department); ICU (Intensive Care Unit); CMAC= C-MAC (Storz, Germany); GS= GlideScope (Verathon, USA); BO= Bonfils (Storz, Germany); McGrath= McGrath (Medtronic, Ireland); McGrath Series 5= McGrath (Medtronic, Ireland); KV= King Vision (Kingssystems, USA); Airtraq (Airtraq, USA); AWS= Airway-scope (Pentax, Japan); NR (Not reported)

## Study aims and objectives

*Primary objective:* Comparing the initial or first-pass success rate of endotracheal intubation with the McGrath video laryngoscope to DL using a Macintosh blade in patients undergoing elective surgery and requiring tracheal intubation.

*Secondary objective:* Comparing the clinical performance of both devices, view of the glottis, influence of neuromuscular agents, correlation between clinical experiences in airway management and success rates.

## Trial design

The EMMA trial is a multicentre, open-label, randomised controlled superiority trial.

## METHODS: PARTICIPANT SELECTION, INTERVENTIONS AND OUTCOMES

This manuscript was written in accordance with the SPIRIT guidelines.<sup>27</sup>

### Study setting

The EMMA trial is performed in eight Divisions of Anaesthesiology in two hospitals (one university and one general hospital). All laryngoscopists are anaesthetists with different levels of clinical experience using direct and video laryngoscopy. After a specific introduction to the study protocol, all anaesthetists from the study centres participated in this trial.

### Eligibility criteria

#### Inclusion criteria

Patients having elective surgery with general anaesthesia and requiring mechanical ventilation via an endotracheal tube are recruited.

#### Exclusion criteria

Patients are not included in this study if they have one or more of the following:

- More than one predictor of an anticipated difficult airway (e.g., BMI > 40 kg/m<sup>2</sup>, unanticipated difficult airway in the medical history (e.g., C&L ≥ III), reduction of the atlanto-occipital joint extension < 35°, reduced thyromental distance < 6 cm or Mallampati class ≥ III);
- Age < 18 years;
- ASA class IV;

- Pregnant or breastfeeding;
- Participation in other studies;
- Unable to provide informed written consent or under guardianship;
- Urgent surgical intervention; and
- At high risk for aspiration.

## Intervention

Concomitant treatments in both groups

First, patients admitted requiring elective tracheal intubation are evaluated for predictors of anticipated difficult intubation (body mass index, head extension, thyromental distance, Mallampati class, mouth opening and previous difficult airway (e.g., C&L  $\geq$  III). The expertise of the participating anaesthesiologists ranges from “beginner” (residents) to “expert” (consultants). All anaesthetists received hands-on training and theoretical introduction to the use of the McGrath VL and direct laryngoscopy. Tracheal intubation is performed in both groups following the protocol outlined below (Figure 1).

(A) All patients are monitored for ECG, oxygen saturation ( $SO_2$ ), and arterial blood pressure (non-invasive or invasive as appropriate). In the McGrath group, a malleable stylet in a “hockey-stick” shape is always used for tube placement.

Pre-oxygenation is achieved using the device chosen by the provider based on patient characteristics and clinical standard operating procedure ( $EtO_2 > 80\%$ ). In the study locations a Pallas<sup>®</sup> / Primus<sup>®</sup> (Dräger Lübeck, Germany) anaesthesia respiratory system is used:

- Tidal volume breathing with normal breaths for at least 3 min or with eight deep breaths over 60 seconds (8 DB 60 sec);<sup>28,29</sup>
- Anaesthesia ventilator in pressure support (PS) mode (PS 8 mbar, PEEP 5 mbar and  $FiO_2$  1.0).<sup>29,30</sup>

(B) After sufficient pre-oxygenation, anaesthesia is induced with sufentanil (0.2 – 0.5  $\mu\text{g.kg}^{-1}$ ) and propofol (2 – 3  $\text{mg.kg}^{-1}$ ), and anaesthesia is maintained with either propofol infusion (TIVA) or volatile anaesthetics. After the patient is deeply anaesthetised, the neuromuscular transmission is monitored using acceleromyography of the adductor pollicis. The individual choice of neuromuscular blocking agent depends on the temporal duration of the surgery, necessary of



1  
2  
3 perioperative neurological monitoring, absence of allergies and organ failures. The  
4 following agents and specific dosages are used:

- 5 • Mivacurium (0.2 mg.kg<sup>-1</sup>);
- 6 • Atracurium (0.5 mg.kg<sup>-1</sup>);
- 7 • Rocuronium (0.3 - 0.6 mg.kg<sup>-1</sup>); and
- 8 • Succinylcholine (1 - 2 mg.kg<sup>-1</sup>).

9  
10 The train-of-four (TOF) is used for continuous quantitative monitoring of  
11 neuromuscular transmission. Complete muscle relaxation is confirmed in the  
12 absence of tactile and measured twitches in response to maximal TOF stimulation of  
13 the ulnar nerve at the adductor pollicis. The importance of obtaining adequate  
14 neuromuscular blockade was emphasised with study personnel.  
15  
16  
17  
18  
19  
20  
21  
22

23 (C) The laryngoscopy attempt begins with a TOF count of 0/4 and is performed using  
24 the device indicated by default randomisation:

- 25 • Macintosh laryngoscope (DL) or
- 26 • McGrath<sup>®</sup> MAC video laryngoscope (McGrath) - direct laryngoscopy or indirect  
27 laryngoscopy can be performed at the discretion of the anaesthetist.

28  
29 The provider selects the method for visualisation of the glottis, either direct or  
30 indirect, using the McGrath monitor. The anaesthetist should achieve the best  
31 possible view of the laryngeal structures. External laryngeal manipulations (ELM)  
32 could be used to improve the view of the glottis to achieve a C&L I or II. The size of  
33 the endotracheal tube and the size of the blade are dependent on the standard  
34 operating procedure of the hospital (blade size in both groups: #3 for average  
35 patients and #4 for very tall patients (> 190 cm height); standard ET size: 7.0 ID used  
36 for female patients and 7.5 ID for male patients). The method of visualisation of the  
37 glottis and size of the ET/ blade is recorded in the case report form (CRF).  
38  
39  
40  
41  
42  
43  
44  
45  
46

47 (D) The laryngoscopy attempt is defined as successful if the tracheal tube is placed  
48 (until the black mark on the ET was threaded between the vocal cords) with a single  
49 blade insertion within 120 seconds and without manipulation of the laryngoscope by  
50 another provider. The “time to intubation” is defined as the time measured from the  
51 opening of the patient’s mouth until the ET passed the vocal cords. An anaesthesia  
52 nurse measures the intubation time using the built-in timer on the anaesthesia  
53 respirator. We also analyse two time periods until final placement:  
54  
55  
56  
57  
58  
59  
60

- “Time to view”: defined as the time from insertion of the device until visualisation of the glottis;
- “Time to intubation”: defined as the time from insertion of the device until the ET passed through the vocal cords; and
- “Time to ventilation”: defined as the time from insertion of the ET until the time from the insertion of the device into the mouth until confirmation of the first wave of CO<sub>2</sub> of the anaesthesia respirator.

An intubation attempt is defined as an introduction of the laryngoscope blade into the mouth and its removal regardless of whether an ET was successfully inserted. If this first attempt fails, the provider makes a second laryngoscopy attempt with the same device. Mask ventilation is recommended between the attempts. A total of two laryngoscopy attempts are allowed. If DL fails, the clinician changes to a preferred technique (e.g., McGrath, S-Guide<sup>®</sup>, rigid stylet) and records the direct and/or screen view of the McGrath. If McGrath fails after two attempts, the clinician is advised to proceed with a preferred rescue technique (e.g., C-MAC<sup>®</sup> D-Blade, SGA, iLMA, fiberoptic, rigid stylet). The limitation of two intubation attempts and choice of an alternative technique is recommended by the study protocol and is in accordance with the clinical standard.<sup>31</sup> If ELM techniques, such as BURP (specific pressure applied to the cricoid cartilage), are required during laryngoscopy, they are recorded in the CRF. In all cases, an additional individual who is not involved in patient care (either a postgraduate student or a study nurse) is present during induction of anaesthesia to record the study parameters.

### Outcome measures

#### (a) Primary outcome measure

The primary outcome measure is successful intubation within 120 seconds (time to ventilation) with the first-pass attempt.

#### (b) Secondary outcome measure

- Laryngoscopy Technique: Whether direct or indirect glottic visualisation was used in the McGrath group is recorded
- Different times for successful tracheal intubation
  - Time to view (defined as the time from insertion of the device until glottic view)

- Time to intubation (defined as the time from insertion of the device until the ET passed through the vocal cords)
- Time to ventilation (defined as the time from insertion of the device until the first carbon dioxide wave on the anaesthesia respirator)
- Number of laryngoscopy attempts
- Failures/ crossovers to other rescue techniques (e.g., SGA, iLMA, fiberoptic)
- External laryngeal manipulations (e.g., BURP, cricoid pressure)
- Glottic view with the Cormack & Lehane grade (C&L) and percentage of glottic opening score (POGO)
- Intubation difficulty score (IDS-Score)<sup>32</sup>
- If McGrath is used, occurrence of fogging is recorded
- Comparing the level of training with intubation success
- Complications (e.g., desaturation < 90% SaO<sub>2</sub>, dental or soft tissue trauma)
- Degree of ease or difficulty of tracheal intubation based on the Likert scale (0=easy to 10=difficult)<sup>33,34</sup>

#### (c) Subgroup analysis

- Demographics
  - Patient (age, gender, BMI, ASA class)
  - Airway difficulty score (ADS score)<sup>35</sup>
  - Provider analysis (clinical experience, education status, experience in direct and indirect laryngoscopy)
- Type of neuromuscular blocking agent
- Train-of-four (TOF) count when inserting the laryngoscope
- Type of surgery (e.g., thyroidectomy, neck dissection)

#### **Participant timeline**

The schedule of enrolment and intervention is shown in Figure 1, and the participant timeline is described in Table 2.

Table 2. Participant timeline.

| Timepoint                                 | Study Period |              |                         |                               |                                |            |
|-------------------------------------------|--------------|--------------|-------------------------|-------------------------------|--------------------------------|------------|
|                                           | Enrolment    | Intervention | Intubation              |                               |                                | Extubation |
|                                           | $D_0$        | $D_1$        | $D_1$<br>(Time to view) | $D_1$<br>(Time to intubation) | $D_1$<br>(Time to ventilation) | $D_{1-2}$  |
| Eligibility Assessment                    | X            |              |                         |                               |                                |            |
| Informed consent                          | X            |              |                         |                               |                                |            |
| Randomisation                             | X            |              |                         |                               |                                |            |
| Demographic data and physical Examination | X            |              |                         |                               |                                |            |
| Preoxygenation                            |              | X            |                         |                               |                                |            |
| Induction of Anaesthesia                  |              | X            |                         |                               |                                |            |
| TOF measurement                           |              | X            |                         |                               |                                |            |
| Time measurement                          |              |              | X                       | X                             | X                              |            |
| Glottic View                              |              |              | X                       |                               |                                |            |
| Intubation success                        |              |              |                         |                               | X                              |            |
| Complications                             |              |              | X                       | X                             | X                              | X          |

$D$ = Day;  $D_0$ = Day of Enrolment / Allocation;  $D_1$ = Day of Surgery;  $D_2$ = Intensive care unit (ICU) stay

### Recruitment

Patient inclusion started in 2016 in the Division of Ear, Nose and Throat surgery at University Medical Centre, Mainz, Germany, and inclusion of other divisions over the course of time is planned. The history and physical examinations of all patients scheduled for surgery are screened preoperatively for predictors of difficult airway. Patient recruitment is conducted by one of the study physicians. Patients are included if they require orotracheal intubation with an ET under general anaesthesia with neuromuscular blocking agents.

## **METHODS: ASSIGNMENT OF INTERVENTIONS**

### **Allocation**

After eligibility is confirmed and written informed consent is obtained, enrolled participants are randomised 24 hours before the intervention. A web-based service (QuickCalcs, GraphPad Software, La Jolla, CA, USA) is used for allocating patients to either DL or McGrath.

### **Sequence generation**

The randomisation sequence was generated by a study nurse in the Clinical Research Unit who is not involved in patient recruitment. The software used to collect the data in the CRF automatically allocated the patients, thereby ensuring concealment and anonymity.

### **Blinding**

Blinding to the type of laryngoscopy is only possible for the patient. The performing anaesthesiologist is informed of treatment group prior to induction of anaesthesia.

## **METHODS: DATA COLLECTION, MANAGEMENT, AND ANALYSIS**

### **Data collection and management**

The study data are recorded on a specific paper-based case report form (CRF). Prior to measurement, the data from each patient are collected by study personnel. All outcome measurements are recorded during and after the evaluation on the CRF. Any protocol deviations are recorded either on the CRF or in the medical records; a clinical research assistant ensures that all protocol deviations and adverse events are recorded in the database. If adverse events are observed, the ethics committee will be informed in writing.

Every allocated subject will be coded with a specific patient number. After measurement is completed, the study data will be entered into a premade computer-based table (Microsoft Excel, Version 14.0, Microsoft Corporation, Redmond, Washington, USA). The completed CRF will be secured in the Clinical Research Unit for the next 15 years.

### Access to data

Data safety, data quality and statistical analysis will be managed by the two principal investigators, who are responsible for notifying any issues that may arise during the whole prospective study. Data is collected and stored according to GCP guidelines and is available to all participating study sites. Any issue occurring during the clinical trial will be reported to the principal investigators.

### Statistics

For statistical analysis, GraphPad Prism (Version. 6.0 for MAC; GraphPad Software, La Jolla, CA, USA) will be used. Data are expressed as the median (interquartile range [IQR]) for non-Gaussian variables. The statistical analysis will conform to the CONSORT statement for non-pharmacological interventions.

#### Description of the patient groups at baseline

The baseline features of the patients will be described using absolute numbers (n) and percentages for categorical variables and the minimum, maximum, mean, SD and quartiles for quantitative variables. We will use the Pearson correlation coefficient to compare patient specifics (e.g., BMI, ADS score) between the groups at the baseline.

#### Analysis of the primary outcome

A chi-squared test will be used to compare the success rate between the two groups. Multiple regression analysis of subgroup factors will allow the determination of important factors affecting successful first-time intubation comparing DL with McGrath. Relationships between the experience of the provider and the first-attempt intubation rate or time to intubation will be analysed as paired samples with Bonferroni correction for multiple comparisons. The differences will be considered statistically significant if the p-value is less than 0.05.

#### Analysis of the secondary outcomes

Comparison of the view of the glottis, overall intubation time and the Likert scale score will be analysed by the Wilcoxon's Rank Sum test. Comparing the different level of training with the intubation success with the Spearman's rank correlation coefficient.

### Subgroup analysis

We will perform a separate analysis of the specific type of surgery (e.g., thyroidectomy, neck dissection), influence of neuromuscular agents and/or patients with difficult intubation, defined as more than two attempts or IDS score > 5.

### Sample Size

A sample size calculation was based on achieving successful tracheal intubation on the first attempt within 120 seconds (time to ventilation) compared to more than one attempt. We determined the power of the study by assuming a first-pass success rate of 85% (DL)<sup>13,14</sup> and 90% (McGrath).<sup>36,37</sup> On the basis of the current first-pass success rate, we hypothesised that an increase of 5% by skilled laryngoscopists in the McGrath group compared to the DL group would be a relevant improvement in airway management. We determined that the inclusion of 1000 patients per group would show relevant differences. With 1000 patients, an increase from 85% - 90% (DL) and 90% to 95% (McGrath) in the first-pass success rate can be observed with a power of 96% at the 1.67% significance level.

## VI. METHODS: MONITORING

### Data monitoring

Prior to the start of patient enrolment, the study physicians and the clinical research assistants were involved in the study protocol and data collection in CRFs. All documents required for the study (e.g., informed consent, CRF baseline and perioperative) are available in the operating room, where the study measurement begins. The CRF is prepared and managed by the investigator. Because this is an investigator initiated trial (IIT), the principal investigator meets with clinical research assistants to discuss any problems in data collection and protocol compliance and to evaluate study progress. This study is proposed, managed and will be analysed in accordance with the ICH Guideline for GCP (good clinical practice) E6 (R2) and following the requirements of German law. All persons (e.g., investigator, study assistants) are obliged to follow these rules.

## Harms

The study may be temporarily stopped for an individual patient, at the discretion of the attending physician, in case of major serious adverse events suspected to be associated with the type of laryngoscope used. An adverse event or suspected adverse reaction is considered "serious" if, in the view of either the investigator or sponsor, it results in any of the following outcomes: Death, a life-threatening adverse event, inpatient hospitalisation or prolongation of existing hospitalisation, a persistent or significant incapacity or substantial disruption of the ability to conduct normal life functions.

Reporting of severe adverse events (SAE) will be per local Research Ethics Committee (REC) standard operating procedures. SAEs will include the following when occurring as a result of airway manipulation (e.g. cardiac arrest, acute circulatory failure, death, vocal cord injury, oesophageal rupture). The principal investigator informs the REC about the SAE. No specific reporting procedure for unexpected serious adverse events is planned.

## Auditing

The Clinical Research Unit of the Department of Anaesthesiology, University Medical Centre Mainz reviews the screening form and clinical data at regular intervals.

## ETHICS AND DISSEMINATION

### Research ethics approval

This study is conducted in adherence with the current version of the Declaration of Helsinki and GCP Guidelines. The initial research project was approved by the ethics committee (Medical Association of the State of Rhineland Palatine, Germany) in October 2015 (Registration Nr.: 837.296.15 (10064); NCT 02611986). It was also approved by the Medical Association Westphalia, Lippe, Germany, in March 2016 (Registration Nr.: 2016-110-b-S).

### Consent or assent

Prior to the trial, patients must consent orally and in writing after the possible consequences of the clinical study are explained in an understandable way. All documents must be written in German and comprehensible. According to German law, only a physician can have the conversation with the participant. The patient



1  
2  
3 receives a copy of the signed patient information and informed consent. A patient  
4 may withdraw from the study at any time if he is unwilling to continue in the trial. In  
5 this case, the data from a patient who requests full withdrawal will not be considered  
6 in the data analysis.  
7  
8  
9

### 10 11 **Confidentiality**

12 All original documents will be kept in the Clinical Research Unit for the next 15 years.  
13 The study data will be handled as requested by the German Federal Data Protection  
14 Act, which implements the Directive 95/46/EC on data protection (Data Protection  
15 Directive). All original records will be kept on file at the trial sites or coordinating data  
16 managing centre for 15 years. The cleaned electronic trial database file will be  
17 anonymised and kept on file for 15 years.  
18  
19  
20  
21  
22  
23

### 24 25 **Declaration of interests**

26 Neither the Department of Anaesthesiology of the University Medical Centre of the  
27 Johannes Gutenberg University-Mainz, Germany nor any of its employees received  
28 any compensation for this work. No funding or competing interests are declared.  
29 None of the authors have financial interests or received honoraria or paid expert  
30 testimony. None of the authors have any personal relationships with people or  
31 organisations that could inappropriately influence (bias) this work. Covidien<sup>®</sup>, which  
32 produces the McGrath video laryngoscope, had no role in the study design and will  
33 have no role in its conduct, data collection, analysis, or interpretation, or the decision  
34 to submit the results for publication. The findings of this study will be presented at  
35 conferences and disseminated through publication in a peer reviewed journal.  
36  
37  
38  
39  
40  
41  
42  
43

### 44 45 **DISCUSSION**

46 To our knowledge, the EMMA trial is one of the largest such randomised, multicentre  
47 trials. Several studies have suggested that video laryngoscopy and direct  
48 laryngoscopy using a Macintosh blade had similar intubation success rates.<sup>7,11,20,23</sup>  
49 The weaknesses of the existing research include the study setting (e.g., manikin-  
50 based study or measurement in ICU)<sup>9,10,19,20</sup> and study design (e.g., inadequate  
51 sample size or variables in anaesthesia induction).<sup>3,5,23</sup> Furthermore, the clinical  
52 experience of the user was not usually taken into account.<sup>4,6,10,23,25</sup> To our  
53 knowledge, the EMMA study is the only clinical, multicentre, randomised study with  
54  
55  
56  
57  
58  
59  
60

1  
2  
3 2000 patients comparing video laryngoscopy and direct laryngoscopy for the first  
4 attempt tracheal intubation. This trial has an open-label design; blinding of the  
5 operator or the patient are not feasible. However, the primary outcome measure is  
6 the presence of the inflection on the expired capnography curve to ensure that the  
7 ET is in the tracheal position. The main outcome of other studies was the duration of  
8 the intubation attempt. For detailed information about the overall intubation time, we  
9 divide the overall time into three time periods, from insertion of the laryngoscope until  
10 the first ventilation. The visualisation of the glottis is another preferred outcome  
11 parameter in several airway studies, but a good view of the glottis cannot be  
12 associated with successful or faster tracheal intubation.<sup>20,21</sup> Furthermore, the number  
13 of attempts constitutes a relevant factor for increased airway complications (e.g., risk  
14 of aspiration, tissue/ mucosal damage) and desaturation during the intubation  
15 process.<sup>14-17</sup>

16  
17  
18  
19  
20  
21  
22  
23  
24  
25  
26 In conclusion, if our main hypothesis is confirmed, video laryngoscopy might become  
27 the reference standard in the operating room. The expected benefits of this practice  
28 include improved instruction of airway management and influence of neuromuscular  
29 agents for the intubation procedure as well as improved patient safety in terms of  
30 decreased airway complications (e.g., hypoxemia, aspiration).

### 31 32 33 34 35 36 **Acknowledgements**

37 The authors wish to thank Irene Schmidtmann (Institute of Medical Biostatistics,  
38 Epidemiology and Informatics, University Medical Centre of the Johannes Gutenberg-  
39 University, Mainz, Germany). We are also grateful to all of the participants in the  
40 study.  
41  
42  
43  
44  
45

### 46 47 **Contributors**

48 MK and RN designed the trial and prepared the manuscript. TP, IT and CA  
49 participated in designing the EMMA trial. IS wrote the statistical analysis plan and  
50 estimated the sample size. None of the authors have financial interests or received  
51 honoraria or paid expert testimony. None of the authors have any personal  
52 relationships with people or organisations that could inappropriately influence (bias)  
53 this work. The authors alone are responsible for the content and writing of the paper.  
54  
55  
56  
57  
58  
59  
60

## Funding and competing interests

No funding or competing interests are declared.

## Patient consent

Obtained.

## REFERENCES

1. Mulcaster JT, Mills J, Hung OR, MacQuarrie K, Law JA, Pytka S, et al. Laryngoscopic intubation: learning and performance. *Anesthesiol* 2003;98:23-7.
2. Konrad C, Schupfer G, Wietlisbach M, Gerber H. Learning manual skills in anesthesiology: Is there a recommended number of cases for anesthetic procedures? *Anesth analg* 1998;86:635-9.
3. Silverberg MJ, Li N, Acquah SO, Kory PD. Comparison of video laryngoscopy versus direct laryngoscopy during urgent endotracheal intubation: a randomized controlled trial. *Crit Care* 2015;43:636-41.
4. Park S. O., Kim J. W., Na J. H., Lee K. H., Lee K. R., Hong D. Y., et al. Video laryngoscopy improves the first-attempt success in endotracheal intubation during cardiopulmonary resuscitation among novice physicians. *Resuscitation* 2015;89:188-94.
5. Ahmadi K, Ebrahimi M, Hashemian AM, Sarshar S, Rahimi-Movaghar V. GlideScope Video Laryngoscope for Difficult Intubation in Emergency Patients: a Quasi-Randomized Controlled Trial. *Acta Med Iran* 2015;53:738-42.
6. Sakles J. C., Mosier J. M., Chiu S., Keim S. M. Tracheal Intubation in the Emergency Department: A Comparison of GlideScope® Video Laryngoscopy to Direct Laryngoscopy in 822 Intubations. *J Emerg Med* 2011;42:400-5.
7. Yeatts DJ, Dutton RP, Hu PF, Chang YW, Brown CH, Chen H, et al. Effect of video laryngoscopy on trauma patient survival: a randomized controlled trial. *J Trauma Acute Care Surg* 2013;75:212-9.
8. Mosier JM, Whitmore SP, Bloom JW, Snyder LS, Graham LA, Carr GE, et al. Video laryngoscopy improves intubation success and reduces esophageal intubations compared to direct laryngoscopy in the medical intensive care unit. *Crit Care* 2013;17:R237.

- 1  
2  
3 9. Noppens RR, Geimer S, Eisel N, David M, Piepho T. Endotracheal intubation  
4 using the C-MAC<sup>®</sup> video laryngoscope or the Macintosh laryngoscope: A  
5 prospective, comparative study in the ICU. *Crit Care* 2012;16:R103.  
6  
7
- 8 10. Kory P, Guevarra K, Mathew JP, Hegde A, Mayo PH. The impact of video  
9 laryngoscopy use during urgent endotracheal intubation in the critically ill.  
10 *Anesth Analg* 2013;117:144-9.  
11
- 12 11. Piepho T., Fortmueller K., Heid F. M., Schmidtmann I., Werner C., Noppens R.  
13 R. Performance of the C-MAC video laryngoscope in patients after a limited  
14 glottic view using Macintosh laryngoscopy. *Anaesthesia* 2011;66:1101-5.  
15
- 16 12. Michailidou M, O'Keeffe T, Mosier JM, Friese RS, Joseph B, Rhee P, et al. A  
17 comparison of video laryngoscopy to direct laryngoscopy for the emergency  
18 intubation of trauma patients. *World J Surg* 2015;39:782-788.  
19
- 20 13. Vassiliadis J, Tzannes A, Hitos K, Brimble J, Fogg T. Comparison of the C-  
21 MAC video laryngoscope with direct Macintosh laryngoscopy in the emergency  
22 department. *Emerg Med Australas* 2015;27:119-125.  
23
- 24 14. Platts-Mills TF, Campagne D, Chinnock B, Snowden B, Glickman LT, Hendey  
25 GW. A comparison of GlideScope video laryngoscopy versus direct  
26 laryngoscopy intubation in the emergency department. *Acad Emerg Med*  
27 2009;16:866-871.  
28
- 29 15. Mort TC. Emergency tracheal intubation: complications associated with  
30 repeated laryngoscopic attempts. *Anesth Analg* 2004;99:607-13.  
31
- 32 16. Hasegawa K, Shigemitsu K, Hagiwara Y, Chiba T et al. Association between  
33 repeated intubation attempts and adverse events in emergency departments:  
34 an analysis of a multicenter prospective observational study. *Ann Emerg Med*  
35 2012;60:749-54.  
36
- 37 17. Sakles JC, Javedani PP, Chase E et al. The use of a video laryngoscope by  
38 emergency medicine residents is associated with a reduction in esophageal  
39 intubations in the emergency department. *Acad Emerg Med* 2015;22:700-7.  
40
- 41 18. Noppens R.R, Mobus S, Heid F, Schmidtmann I, Werner C, Piepho T.  
42 Evaluation of the McGrath Series 5 videolaryngoscope after failed direct  
43 laryngoscopy. *Anaesthesia* 2010;65:716-20.  
44
- 45 19. Kaplan A, Goksu E, Yildiz G, Kilic T. Comparison of the C-MAC  
46 Videolaryngoscope and Rigid Fiberscope with Direct Laryngoscopy in Easy  
47  
48  
49  
50  
51  
52  
53  
54  
55  
56  
57  
58  
59  
60

- 1  
2  
3 and Difficult Airway Scenarios: A Manikin Study. *J Emerg Med* 2016;50:107-  
4 14.  
5  
6 20. Ruetzler K, Imach S, Weiss M, Haas T, Schmidt AR. Comparison of five video  
7 laryngoscopes and conventional direct laryngoscopy : Investigations on simple  
8 and simulated difficult airways on the intubation trainer. *Anaesthetist*  
9 2015;64:513-9.  
10  
11 21. Savoldelli GL, Schiffer E, Abegg C, Baeriswyl V, Clergue F, Waeber JL.  
12 Comparison of the Glidescope, the McGrath, the Airtraq and the Macintosh  
13 laryngoscopes in simulated difficult airways. *Anaesthesia* 2008;63:1358-64.  
14  
15 22. Aziz MF, Abrons RO, Cattano D, Bayman EO, Swanson DE, Hagberg CA,  
16 Todd MM, Brambrink AM. First-Attempt Intubation Success of Video  
17 Laryngoscopy on Patients with Anticipated Difficult Direct Laryngoscopy: A  
18 Multicenter Randomized Controlled Trial Comparing the C-MAC D-Blade  
19 Versus the GlideScope in a Mixed Provider and Diverse Patient Population.  
20 *Anesth Analg* 2016;122:740-50.  
21  
22 23. Piepho T, Weinert K, Heid FM, Werner C, Noppens RR. Comparison of the  
23 McGrath® Series 5 and GlideScope® Ranger with the Macintosh laryngoscope  
24 by paramedics. *Scand J Trauma Resusc Emerg Med*. 2011;19:4.  
25  
26 24. Savoldelli GL, Schiffer E, Abegg C, Baeriswyl V, Clergue F, Waeber JL.  
27 Learning curves of the Glidescope, the McGrath and the Airtraq  
28 laryngoscopes: a manikin study. *Eur J Anaesthesiol* 2009;26:554-8.  
29  
30 25. Wallace CD, Foulds LT, McLeod GA, Younger RA, McGuire BE. A comparison  
31 of the ease of tracheal intubation using a McGrath® laryngoscope and a  
32 standard Macintosh laryngoscope. *Anaesthesia* 2015;70:1281-5.  
33  
34 26. Bailly A, Lascarrou JB. McGrath videolaryngoscope versus Macintosh  
35 laryngoscope for orotracheal intubation in intensive care patients: the  
36 randomised multicentre MACMAN trial study protocol. *BMJ Open*  
37 2015;5:e009855.  
38  
39 27. Chan AW, Tetzlaff JM, Gotzsche PC, Altman DG, Mann H, Berlin JA, et al.  
40 SPIRIT 2013 explanation and elaboration: guidance for protocols of clinical  
41 trials. *BMJ* 2013;346:7586  
42  
43 28. McCrory JW, Matthews JN. Comparison of four methods of preoxygenation.  
44 *Brit J Anaesth* 1990;64:571-6.  
45  
46  
47  
48  
49  
50  
51  
52  
53  
54  
55  
56  
57  
58  
59  
60

- 1  
2  
3 29. Tanoubi I, Drolet P, Donati F. Optimizing preoxygenation in adults. *Can J*  
4 *Anaesth* 2009;56:449-66.  
5  
6 30. Murphy C, Wong DT. Airway management and oxygenation in obese patients.  
7 *Can J Anaesth* 2013;60:929-45.  
8  
9 31. Piepho T, Cavus E, Noppens R, Byhahn C, Dorges V, Zwissler B, et al. S1  
10 guidelines on airway management : Guideline of the German Society of  
11 Anesthesiology and Intensive Care Medicine. *Anaesthesist* 2015;64:27-40.  
12  
13 32. Adnet F., Borron S. W., Racine S. X., Clemessy J. L., Fournier J. L., Plaisance  
14 P., et al. The intubation difficulty scale (IDS): proposal and evaluation of a new  
15 score characterizing the complexity of endotracheal intubation. *Anesthesiology*  
16 1997;87:1290-7.  
17  
18 33. Weiss M, Schwarz U, Gerber AC. Difficult airway management: comparison of  
19 the Bullard laryngoscope with the video-optical intubation stylet. *Can J Anesth*  
20 2000;47:280-284.  
21  
22 34. Makwana HD, Suthar NN, Gajjar MP, Thakor AV. Developing competency in  
23 interns for endotracheal intubation: An educational article. *Int J App Basic Med*  
24 2016;6:201-204.  
25  
26 35. Janssens M.; Lamy, M. Airway Difficulty Score (ADS): a new score to predict  
27 difficulty in airway management. *Eur J Anaesthesiol* 2000;17:35.  
28  
29 36. Purugganan RV, Jackson TA, Heir JS, Wang H, Cata JP. Video laryngoscopy  
30 versus direct laryngoscopy for double-lumen endotracheal tube intubation: a  
31 retrospective analysis. *J Cardiothorac Vasc Anesth* 2012;26:845-848.  
32  
33 37. Kasuya Y, Takahashi E, Nagai M, Ozaki M. Comparison of Tracheal Intubation  
34 Performance between Macintosh Direct Laryngoscope and McGrath® MAC  
35 Video Laryngoscope among Anesthesia Trainees. *Masui* 2015;64:1291-1296.  
36  
37  
38  
39  
40  
41  
42  
43  
44  
45

## TABLE AND FIGURE

46  
47 **Figure 1. Study flow-chart.**

48  
49 **Table 1. Recapitulation of previous studies on endotracheal intubation with**  
50 **video laryngoscopy in different study setting.**

51  
52  
53 **Table 2. Participant timeline.**  
54  
55  
56  
57  
58  
59  
60

1  
2  
3  
4  
5  
6  
7  
8  
9  
10  
11  
12  
13  
14  
15  
16  
17  
18  
19  
20  
21  
22  
23  
24  
25  
26  
27  
28  
29  
30  
31  
32  
33  
34  
35  
36  
37  
38  
39  
40  
41  
42  
43  
44  
45  
46  
47  
48  
49  
50  
51  
52  
53  
54  
55  
56  
57  
58  
59  
60

For peer review only

Figure 1: Study flow-chart

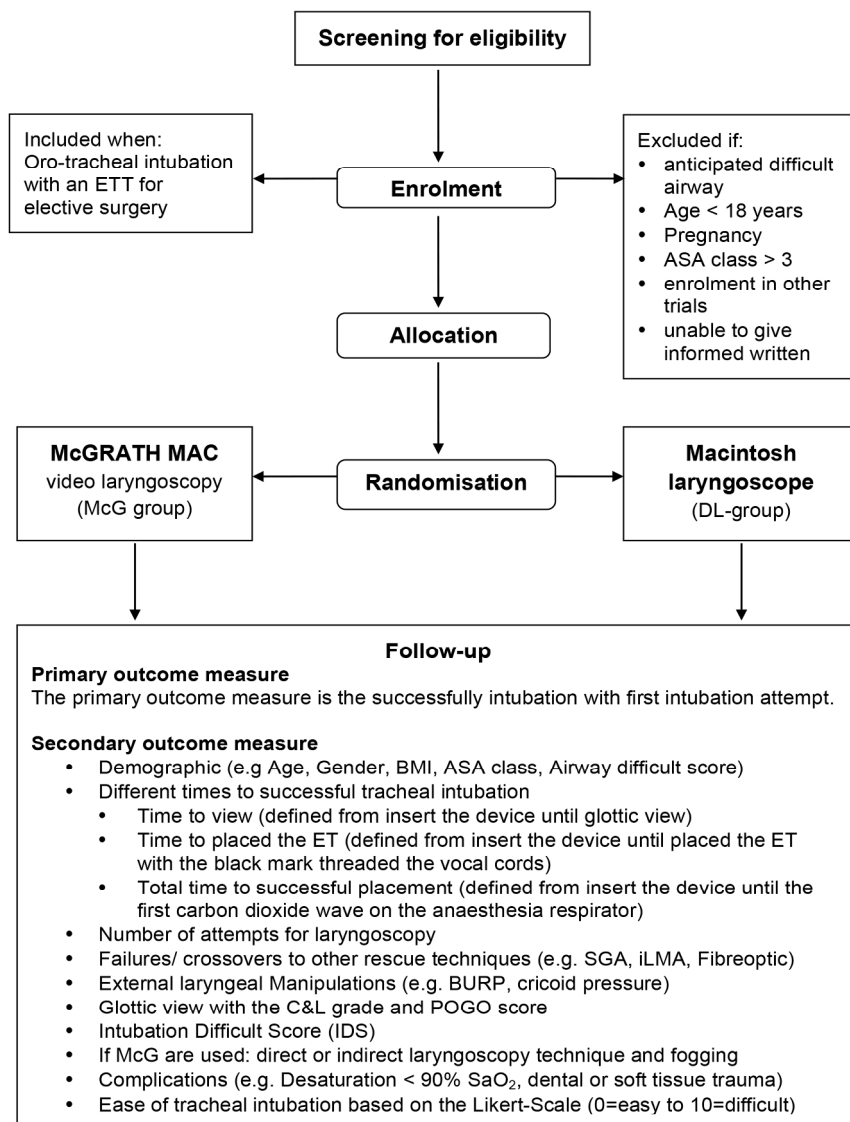

Study flow-chart



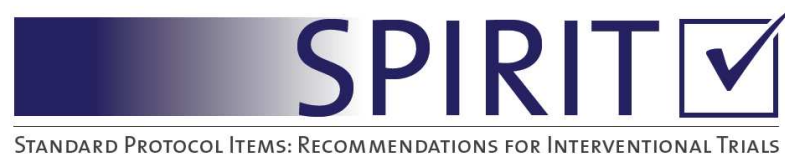

SPIRIT 2013 Checklist: Recommended items to address in a clinical trial protocol and related documents\*

| Section/item                      | Item No | Description                                                                                                                                                                                                                                                                              | Addressed on page number |
|-----------------------------------|---------|------------------------------------------------------------------------------------------------------------------------------------------------------------------------------------------------------------------------------------------------------------------------------------------|--------------------------|
| <b>Administrative information</b> |         |                                                                                                                                                                                                                                                                                          |                          |
| Title                             | 1       | Descriptive title identifying the study design, population, interventions, and, if applicable, trial acronym                                                                                                                                                                             | 1_____                   |
| Trial registration                | 2a      | Trial identifier and registry name. If not yet registered, name of intended registry                                                                                                                                                                                                     | 4,17_____                |
|                                   | 2b      | All items from the World Health Organization Trial Registration Data Set                                                                                                                                                                                                                 | n/a_____                 |
| Protocol version                  | 3       | Date and version identifier                                                                                                                                                                                                                                                              | 17_____                  |
| Funding                           | 4       | Sources and types of financial, material, and other support                                                                                                                                                                                                                              | 18,20_____               |
| Roles and responsibilities        | 5a      | Names, affiliations, and roles of protocol contributors                                                                                                                                                                                                                                  | 1,19_____                |
|                                   | 5b      | Name and contact information for the trial sponsor                                                                                                                                                                                                                                       | 1-2_____                 |
|                                   | 5c      | Role of study sponsor and funders, if any, in study design; collection, management, analysis, and interpretation of data; writing of the report; and the decision to submit the report for publication, including whether they will have ultimate authority over any of these activities | 18,19_____               |
|                                   | 5d      | Composition, roles, and responsibilities of the coordinating centre, steering committee, endpoint adjudication committee, data management team, and other individuals or groups overseeing the trial, if applicable (see Item 21a for data monitoring committee)                         | 13,14,16_____            |

1  
2  
3  
4  
5  
6  
7  
8  
9  
10  
11  
12  
13  
14  
15  
16  
17  
18  
19  
20  
21  
22  
23  
24  
25  
26  
27  
28  
29  
30  
31  
32  
33  
34  
35  
36  
37  
38  
39  
40  
41  
42  
43  
44  
45  
46  
47  
48  
49**Introduction**

|                          |    |                                                                                                                                                                                                           |              |
|--------------------------|----|-----------------------------------------------------------------------------------------------------------------------------------------------------------------------------------------------------------|--------------|
| Background and rationale | 6a | Description of research question and justification for undertaking the trial, including summary of relevant studies (published and unpublished) examining benefits and harms for each intervention        | 5,6_____     |
|                          | 6b | Explanation for choice of comparators                                                                                                                                                                     | 5,6_____     |
| Objectives               | 7  | Specific objectives or hypotheses                                                                                                                                                                         | 6,8_____     |
| Trial design             | 8  | Description of trial design including type of trial (eg, parallel group, crossover, factorial, single group), allocation ratio, and framework (eg, superiority, equivalence, noninferiority, exploratory) | 8,17,18_____ |

**Methods: Participants, interventions, and outcomes**

|                      |     |                                                                                                                                                                                                                                                                                                                                                                                |              |
|----------------------|-----|--------------------------------------------------------------------------------------------------------------------------------------------------------------------------------------------------------------------------------------------------------------------------------------------------------------------------------------------------------------------------------|--------------|
| Study setting        | 9   | Description of study settings (eg, community clinic, academic hospital) and list of countries where data will be collected. Reference to where list of study sites can be obtained                                                                                                                                                                                             | 8,17,18_____ |
| Eligibility criteria | 10  | Inclusion and exclusion criteria for participants. If applicable, eligibility criteria for study centres and individuals who will perform the interventions (eg, surgeons, psychotherapists)                                                                                                                                                                                   | 8,9_____     |
| Interventions        | 11a | Interventions for each group with sufficient detail to allow replication, including how and when they will be administered                                                                                                                                                                                                                                                     | 9-11_____    |
|                      | 11b | Criteria for discontinuing or modifying allocated interventions for a given trial participant (eg, drug dose change in response to harms, participant request, or improving/worsening disease)                                                                                                                                                                                 | n/a_____     |
|                      | 11c | Strategies to improve adherence to intervention protocols, and any procedures for monitoring adherence (eg, drug tablet return, laboratory tests)                                                                                                                                                                                                                              | n/a_____     |
|                      | 11d | Relevant concomitant care and interventions that are permitted or prohibited during the trial                                                                                                                                                                                                                                                                                  | 9-11,13_____ |
| Outcomes             | 12  | Primary, secondary, and other outcomes, including the specific measurement variable (eg, systolic blood pressure), analysis metric (eg, change from baseline, final value, time to event), method of aggregation (eg, median, proportion), and time point for each outcome. Explanation of the clinical relevance of chosen efficacy and harm outcomes is strongly recommended | 11,12_____   |
| Participant timeline | 13  | Time schedule of enrolment, interventions (including any run-ins and washouts), assessments, and visits for participants. A schematic diagram is highly recommended (see Figure)                                                                                                                                                                                               | 12,13_____   |

|   |             |    |                                                                                                                                                                                       |            |
|---|-------------|----|---------------------------------------------------------------------------------------------------------------------------------------------------------------------------------------|------------|
| 1 |             |    |                                                                                                                                                                                       |            |
| 2 |             |    |                                                                                                                                                                                       |            |
| 3 | Sample size | 14 | Estimated number of participants needed to achieve study objectives and how it was determined, including clinical and statistical assumptions supporting any sample size calculations | 16,19_____ |
| 4 |             |    |                                                                                                                                                                                       |            |
| 5 |             |    |                                                                                                                                                                                       |            |
| 6 | Recruitment | 15 | Strategies for achieving adequate participant enrolment to reach target sample size                                                                                                   | 13_____    |
| 7 |             |    |                                                                                                                                                                                       |            |

### 8 **Methods: Assignment of interventions (for controlled trials)**

#### 9 Allocation:

|    |                                  |     |                                                                                                                                                                                                                                                                                                                                                          |            |
|----|----------------------------------|-----|----------------------------------------------------------------------------------------------------------------------------------------------------------------------------------------------------------------------------------------------------------------------------------------------------------------------------------------------------------|------------|
| 10 |                                  |     |                                                                                                                                                                                                                                                                                                                                                          |            |
| 11 |                                  |     |                                                                                                                                                                                                                                                                                                                                                          |            |
| 12 | Sequence generation              | 16a | Method of generating the allocation sequence (eg, computer-generated random numbers), and list of any factors for stratification. To reduce predictability of a random sequence, details of any planned restriction (eg, blocking) should be provided in a separate document that is unavailable to those who enrol participants or assign interventions | 13,14_____ |
| 13 |                                  |     |                                                                                                                                                                                                                                                                                                                                                          |            |
| 14 |                                  |     |                                                                                                                                                                                                                                                                                                                                                          |            |
| 15 |                                  |     |                                                                                                                                                                                                                                                                                                                                                          |            |
| 16 |                                  |     |                                                                                                                                                                                                                                                                                                                                                          |            |
| 17 |                                  |     |                                                                                                                                                                                                                                                                                                                                                          |            |
| 18 | Allocation concealment mechanism | 16b | Mechanism of implementing the allocation sequence (eg, central telephone; sequentially numbered, opaque, sealed envelopes), describing any steps to conceal the sequence until interventions are assigned                                                                                                                                                | 14_____    |
| 19 |                                  |     |                                                                                                                                                                                                                                                                                                                                                          |            |
| 20 |                                  |     |                                                                                                                                                                                                                                                                                                                                                          |            |
| 21 |                                  |     |                                                                                                                                                                                                                                                                                                                                                          |            |
| 22 | Implementation                   | 16c | Who will generate the allocation sequence, who will enrol participants, and who will assign participants to interventions                                                                                                                                                                                                                                | 17,18_____ |
| 23 |                                  |     |                                                                                                                                                                                                                                                                                                                                                          |            |
| 24 |                                  |     |                                                                                                                                                                                                                                                                                                                                                          |            |
| 25 | Blinding (masking)               | 17a | Who will be blinded after assignment to interventions (eg, trial participants, care providers, outcome assessors, data analysts), and how                                                                                                                                                                                                                | 14,19_____ |
| 26 |                                  |     |                                                                                                                                                                                                                                                                                                                                                          |            |
| 27 |                                  |     |                                                                                                                                                                                                                                                                                                                                                          |            |
| 28 |                                  | 17b | If blinded, circumstances under which unblinding is permissible, and procedure for revealing a participant's allocated intervention during the trial                                                                                                                                                                                                     | 14,19_____ |
| 29 |                                  |     |                                                                                                                                                                                                                                                                                                                                                          |            |
| 30 |                                  |     |                                                                                                                                                                                                                                                                                                                                                          | —          |
| 31 |                                  |     |                                                                                                                                                                                                                                                                                                                                                          |            |

### 32 **Methods: Data collection, management, and analysis**

|    |                         |     |                                                                                                                                                                                                                                                                                                                                                                                                              |          |
|----|-------------------------|-----|--------------------------------------------------------------------------------------------------------------------------------------------------------------------------------------------------------------------------------------------------------------------------------------------------------------------------------------------------------------------------------------------------------------|----------|
| 33 |                         |     |                                                                                                                                                                                                                                                                                                                                                                                                              |          |
| 34 | Data collection methods | 18a | Plans for assessment and collection of outcome, baseline, and other trial data, including any related processes to promote data quality (eg, duplicate measurements, training of assessors) and a description of study instruments (eg, questionnaires, laboratory tests) along with their reliability and validity, if known. Reference to where data collection forms can be found, if not in the protocol | 14_____  |
| 35 |                         |     |                                                                                                                                                                                                                                                                                                                                                                                                              |          |
| 36 |                         |     |                                                                                                                                                                                                                                                                                                                                                                                                              |          |
| 37 |                         |     |                                                                                                                                                                                                                                                                                                                                                                                                              |          |
| 38 |                         |     |                                                                                                                                                                                                                                                                                                                                                                                                              |          |
| 39 |                         | 18b | Plans to promote participant retention and complete follow-up, including list of any outcome data to be collected for participants who discontinue or deviate from intervention protocols                                                                                                                                                                                                                    | n/a_____ |
| 40 |                         |     |                                                                                                                                                                                                                                                                                                                                                                                                              |          |
| 41 |                         |     |                                                                                                                                                                                                                                                                                                                                                                                                              |          |
| 42 |                         |     |                                                                                                                                                                                                                                                                                                                                                                                                              |          |
| 43 |                         |     |                                                                                                                                                                                                                                                                                                                                                                                                              |          |
| 44 |                         |     |                                                                                                                                                                                                                                                                                                                                                                                                              |          |
| 45 |                         |     |                                                                                                                                                                                                                                                                                                                                                                                                              |          |

1  
2  
3  
4  
5  
6  
7  
8  
9  
10  
11  
12  
13  
14  
15  
16  
17  
18  
19  
20  
21  
22  
23  
24  
25  
26  
27  
28  
29  
30  
31  
32  
33  
34  
35  
36  
37  
38  
39  
40  
41  
42  
43  
44  
45  
46  
47  
48  
49

|                     |     |                                                                                                                                                                                                                                                                   |            |
|---------------------|-----|-------------------------------------------------------------------------------------------------------------------------------------------------------------------------------------------------------------------------------------------------------------------|------------|
| Data management     | 19  | Plans for data entry, coding, security, and storage, including any related processes to promote data quality (eg, double data entry; range checks for data values). Reference to where details of data management procedures can be found, if not in the protocol | 14_____    |
| Statistical methods | 20a | Statistical methods for analysing primary and secondary outcomes. Reference to where other details of the statistical analysis plan can be found, if not in the protocol                                                                                          | 15,16_____ |
|                     | 20b | Methods for any additional analyses (eg, subgroup and adjusted analyses)                                                                                                                                                                                          | 16_____    |
|                     | 20c | Definition of analysis population relating to protocol non-adherence (eg, as randomised analysis), and any statistical methods to handle missing data (eg, multiple imputation)                                                                                   | n/a_____   |

**Methods: Monitoring**

|                 |     |                                                                                                                                                                                                                                                                                                                                       |            |
|-----------------|-----|---------------------------------------------------------------------------------------------------------------------------------------------------------------------------------------------------------------------------------------------------------------------------------------------------------------------------------------|------------|
| Data monitoring | 21a | Composition of data monitoring committee (DMC); summary of its role and reporting structure; statement of whether it is independent from the sponsor and competing interests; and reference to where further details about its charter can be found, if not in the protocol. Alternatively, an explanation of why a DMC is not needed | n/a_____   |
|                 | 21b | Description of any interim analyses and stopping guidelines, including who will have access to these interim results and make the final decision to terminate the trial                                                                                                                                                               | 14,15_____ |
| Harms           | 22  | Plans for collecting, assessing, reporting, and managing solicited and spontaneously reported adverse events and other unintended effects of trial interventions or trial conduct                                                                                                                                                     | 17_____    |
| Auditing        | 23  | Frequency and procedures for auditing trial conduct, if any, and whether the process will be independent from investigators and the sponsor                                                                                                                                                                                           | 17_____    |

**Ethics and dissemination**

|                          |    |                                                                                                                                                                                                                                  |          |
|--------------------------|----|----------------------------------------------------------------------------------------------------------------------------------------------------------------------------------------------------------------------------------|----------|
| Research ethics approval | 24 | Plans for seeking research ethics committee/institutional review board (REC/IRB) approval                                                                                                                                        | 17_____  |
| Protocol amendments      | 25 | Plans for communicating important protocol modifications (eg, changes to eligibility criteria, outcomes, analyses) to relevant parties (eg, investigators, REC/IRBs, trial participants, trial registries, journals, regulators) | n/a_____ |

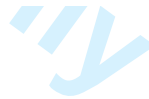

|    |                               |     |                                                                                                                                                                                                                                                                                     |               |
|----|-------------------------------|-----|-------------------------------------------------------------------------------------------------------------------------------------------------------------------------------------------------------------------------------------------------------------------------------------|---------------|
| 1  |                               |     |                                                                                                                                                                                                                                                                                     |               |
| 2  |                               |     |                                                                                                                                                                                                                                                                                     |               |
| 3  | Consent or assent             | 26a | Who will obtain informed consent or assent from potential trial participants or authorised surrogates, and how (see Item 32)                                                                                                                                                        | 17,18_____    |
| 4  |                               |     |                                                                                                                                                                                                                                                                                     |               |
| 5  |                               |     |                                                                                                                                                                                                                                                                                     |               |
| 6  |                               | 26b | Additional consent provisions for collection and use of participant data and biological specimens in ancillary studies, if applicable                                                                                                                                               | n/a_____      |
| 7  |                               |     |                                                                                                                                                                                                                                                                                     |               |
| 8  |                               |     |                                                                                                                                                                                                                                                                                     |               |
| 9  | Confidentiality               | 27  | How personal information about potential and enrolled participants will be collected, shared, and maintained in order to protect confidentiality before, during, and after the trial                                                                                                | 14,17,18_____ |
| 10 |                               |     |                                                                                                                                                                                                                                                                                     |               |
| 11 |                               |     |                                                                                                                                                                                                                                                                                     |               |
| 12 | Declaration of interests      | 28  | Financial and other competing interests for principal investigators for the overall trial and each study site                                                                                                                                                                       | 18,20_____    |
| 13 |                               |     |                                                                                                                                                                                                                                                                                     |               |
| 14 |                               |     |                                                                                                                                                                                                                                                                                     |               |
| 15 | Access to data                | 29  | Statement of who will have access to the final trial dataset, and disclosure of contractual agreements that limit such access for investigators                                                                                                                                     | 15,18_____    |
| 16 |                               |     |                                                                                                                                                                                                                                                                                     |               |
| 17 |                               |     |                                                                                                                                                                                                                                                                                     |               |
| 18 | Ancillary and post-trial care | 30  | Provisions, if any, for ancillary and post-trial care, and for compensation to those who suffer harm from trial participation                                                                                                                                                       | 4,18_____     |
| 19 |                               |     |                                                                                                                                                                                                                                                                                     |               |
| 20 |                               |     |                                                                                                                                                                                                                                                                                     |               |
| 21 | Dissemination policy          | 31a | Plans for investigators and sponsor to communicate trial results to participants, healthcare professionals, the public, and other relevant groups (eg, via publication, reporting in results databases, or other data sharing arrangements), including any publication restrictions | 17,18_____    |
| 22 |                               |     |                                                                                                                                                                                                                                                                                     |               |
| 23 |                               |     |                                                                                                                                                                                                                                                                                     |               |
| 24 |                               |     |                                                                                                                                                                                                                                                                                     |               |
| 25 |                               |     |                                                                                                                                                                                                                                                                                     |               |
| 26 |                               | 31b | Authorship eligibility guidelines and any intended use of professional writers                                                                                                                                                                                                      | n/a_____      |
| 27 |                               |     |                                                                                                                                                                                                                                                                                     |               |
| 28 |                               | 31c | Plans, if any, for granting public access to the full protocol, participant-level dataset, and statistical code                                                                                                                                                                     | n/a_____      |
| 29 |                               |     |                                                                                                                                                                                                                                                                                     |               |
| 30 | <b>Appendices</b>             |     |                                                                                                                                                                                                                                                                                     |               |
| 31 |                               |     |                                                                                                                                                                                                                                                                                     |               |
| 32 | Informed consent materials    | 32  | Model consent form and other related documentation given to participants and authorised surrogates                                                                                                                                                                                  | n/a_____      |
| 33 |                               |     |                                                                                                                                                                                                                                                                                     |               |
| 34 |                               |     |                                                                                                                                                                                                                                                                                     |               |
| 35 | Biological specimens          | 33  | Plans for collection, laboratory evaluation, and storage of biological specimens for genetic or molecular analysis in the current trial and for future use in ancillary studies, if applicable                                                                                      | n/a_____      |
| 36 |                               |     |                                                                                                                                                                                                                                                                                     |               |
| 37 |                               |     |                                                                                                                                                                                                                                                                                     |               |

38 \*It is strongly recommended that this checklist be read in conjunction with the SPIRIT 2013 Explanation & Elaboration for important clarification on the items.  
 39 Amendments to the protocol should be tracked and dated. The SPIRIT checklist is copyrighted by the SPIRIT Group under the Creative Commons  
 40 "[Attribution-NonCommercial-NoDerivs 3.0 Unported](https://creativecommons.org/licenses/by-nc-nd/3.0/)" license.  
 41
